# Supplementary material for: CDKN1A is a target for phagocytosis-mediated cellular immunotherapy in acute leukemia
Source: PubMed Central journal article supplement (PMC9643439; doi:10.1038/s41467-022-34548-3), 2022-11-08
Supplement: 41467_2022_34548_MOESM1_ESM.pdf [file 41467_2022_34548_MOESM1_ESM.pdf]

## Supplementary Information

### **CDKN1A is a target for phagocytosis-mediated cellular immunotherapy in acute leukemia**

*Awatef Allouch et al.*

Description of what is included in this file:

**Supplementary Fig. 1** Characterization of macrophage phagocytosis of leukemia cells.

**Supplementary Fig. 2** CD47 is a key determinant of the phagocytosis of leukemic T cells by macrophages.

**Supplementary Fig. 3** Proinflammatory activation of phagocytic macrophages.

**Supplementary Fig. 4** p21 knockdown does not modulate the cell cycle progression, proliferation or viability of macrophages.

**Supplementary Fig. 5** p21 controls the phagocytosis of leukemic T cells.

**Supplementary Fig. 6** CD47 blockade does not enhance the p21-mediated phagocytosis of MOLT4 cells.

**Supplementary Fig. 7** p21 expression modulates SIRP $\alpha$  protein and membrane cell-surface expression.

**Supplementary Fig. 8** Macrophages derived from p21-expressing genetically engineered monocytes do not exhibit changes in their cell cycle progression, viability, proliferation or proinflammatory activation status.

**Supplementary Fig. 9** Establishment of the adoptive transfer protocol of human monocytes and a mouse model of human T-ALL.

**Supplementary Fig. 10** Lentiviral transduction efficiency of MDMs derived from Co.TD-Mos or p21TD-Mos.

**Supplementary Fig. 11** Biological parameters associated with p21TD-Mo-based cellular therapy for human T-ALL.

**Supplementary Fig. 12** Persistence of p21-engineered macrophages in tumor-free mice.

**Supplementary Fig. 13** p21TD-Mo-based therapy reduces the leukemic burden and prolongs survival in the human T-ALL model.

**Supplementary Fig. 14** Clodronate-containing liposome-mediated depletion of CFSE<sup>+</sup> Co.TD-Mo- and p21TD-Mo-derived macrophages.

**Supplementary Fig. 15** CD47 expression dictates the survival of mCherry<sup>+</sup> MOLT4 cell-engrafted mice.

**Supplementary Fig. 16** p21TD-Mo-based therapy triggers proinflammatory reprogramming of TAMs in the human T-ALL model.

**Supplementary Fig. 17** p21TD-Mo-based therapy does not trigger the pro-inflammatory activation of murine MDMs in the human T-ALL model.

**Supplementary Fig. 18** Characterization of bone marrow invasion in mice engrafted with diagnosed or relapsed T-ALL-derived PDXs.

**Supplementary Fig. 19** IFN $\gamma$  reduces the viability of MOLT4 leukemia cells and prolongs the survival of mCherry<sup>+</sup> MOLT4 cell-engrafted NSG mice.

**Supplementary Fig. 20** Representative sequential FACS sorting/gating strategies.

**Supplementary Fig. 21** Representative sequential FACS gating strategies.

**Supplementary Table 1** Characteristics of the AML patients providing the CD34<sup>+</sup> cells used in this study.

**Supplementary Table 2** Characteristics of the T-ALL patients providing the PDX cells used in this study.

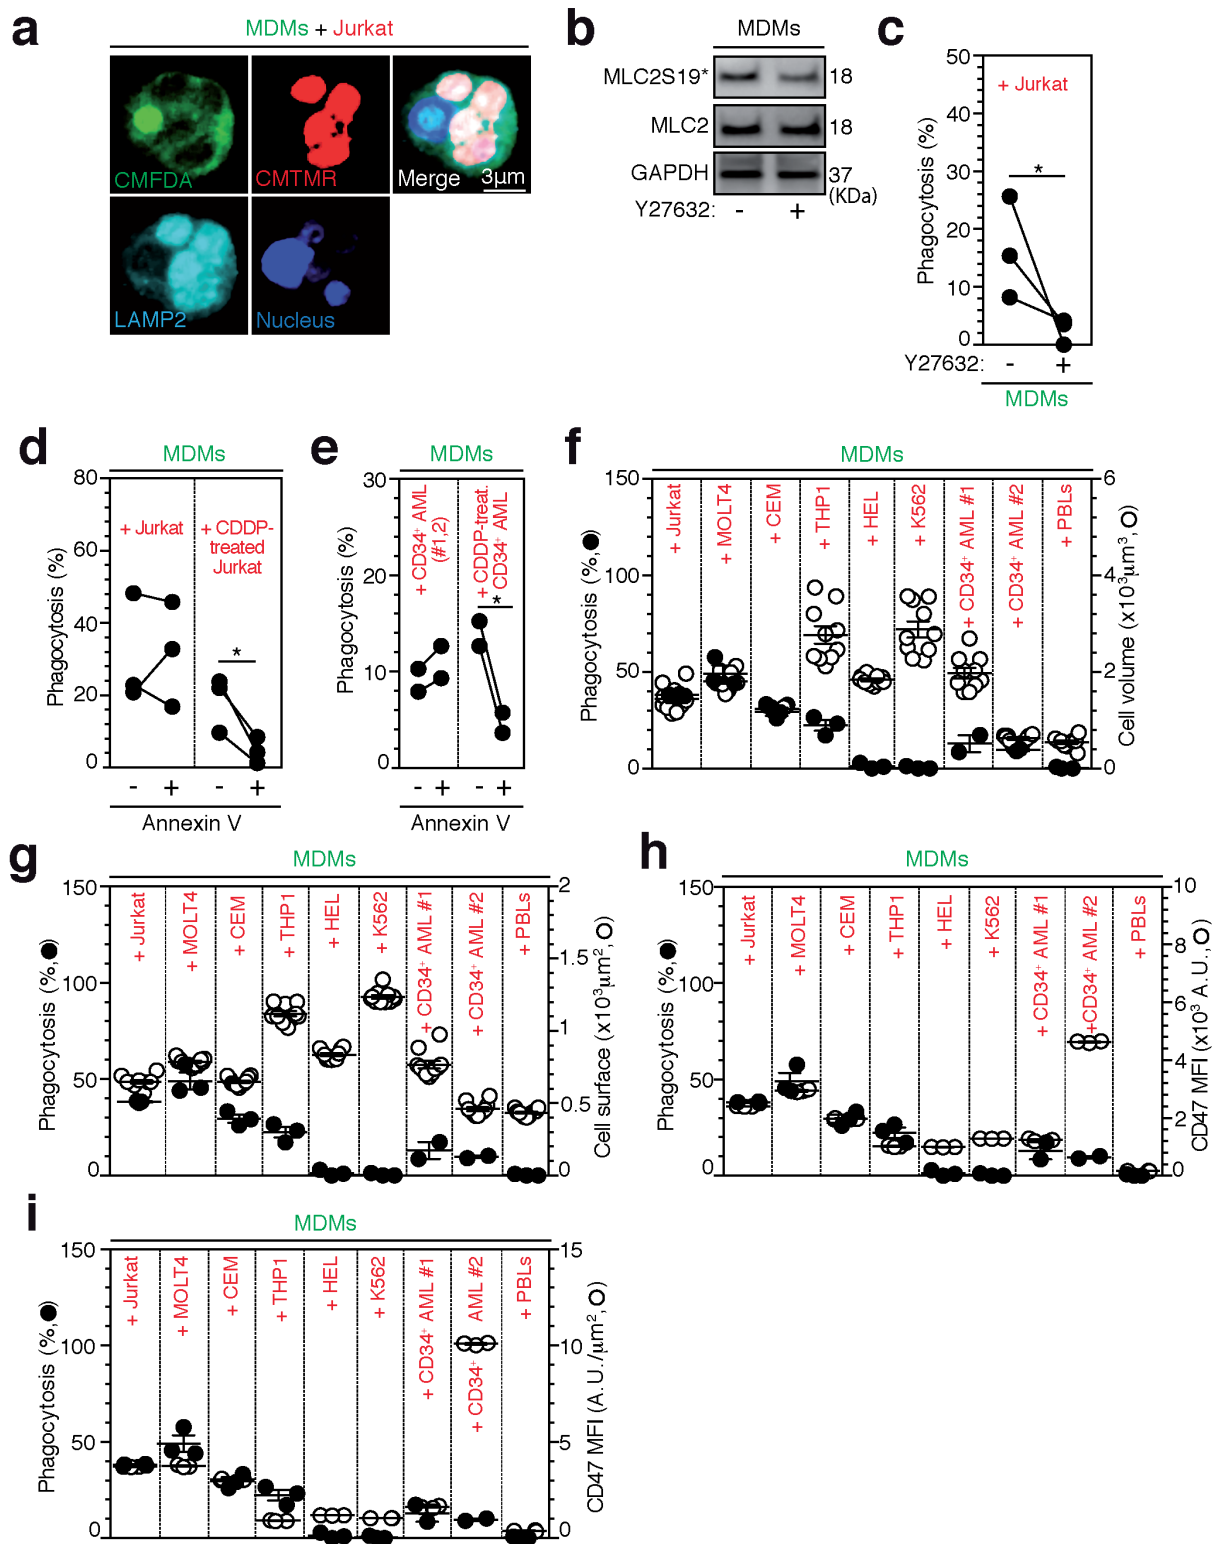

**Supplementary Fig. 1 Characterization of macrophage phagocytosis of leukemia cells. a**

Confocal micrographs of CMFDA-labeled MDMs and CMTMR-labeled Jurkat cells cocultured for 8 h and stained for the lysosomal marker LAMP2. **b** Expression of Myosin Light Chain 2 (MLC2) and its phosphorylated/activated form (MLC2S19\*) evaluated by WB analysis in MDMs treated for 24 h in the absence or presence of Y27632 (30  $\mu$ M), a ROCK pathway inhibitor. **c** Percentages of phagocytosis of Jurkat cells by control- or Y27632-pretreated MDMs, as in (**b**), at 8 h of coculture in the presence or absence of Y27632 (30  $\mu$ M) (\*p=0.05). **d, e** Percentages of phagocytosis of viable or apoptotic (pretreated for 24 h with CDDP (50  $\mu$ M)) Jurkat (\*p=0.05) (**d**) or patient CD34<sup>+</sup> AML (\*p=0.0331) (**e**) cells by MDMs in the presence or absence of human recombinant Annexin V (5  $\mu$ g/ml) for 8 h of coculture. **f, g** Percentages of phagocytosis of the indicated leukemia cells or nontransformed PBLs by MDMs as a function of target cell volume (**f**) and surface (**g**), both determined after 3D reconstruction of 0.22- $\mu$ m confocal microscopy z stacks by Volocity software. **h, i** Percentages of phagocytosis of the indicated leukemia cells or nontransformed PBLs by MDMs as a function of (**h**) membrane CD47 expression determined by FACS (**h**) or normalized (**i**) to the cell surface (**i**). In (**a, b**), the data are representative of n=3 donors. In (**c, d**) and (**e**), the data are donor matched from n=3 and n=2 donors. In (**f, g, h, i**), the data are presented as the mean $\pm$ SEM from n=3 donors and for target cells n=10 (**f, g**) or n=3 (**h, i**) independent experiments. Exact p-values are indicated and determined with ordinary two-way ANOVA (**d, e**) and one-tailed Mann-Whitney (**c**) tests. Source data are provided as a Source Data file.



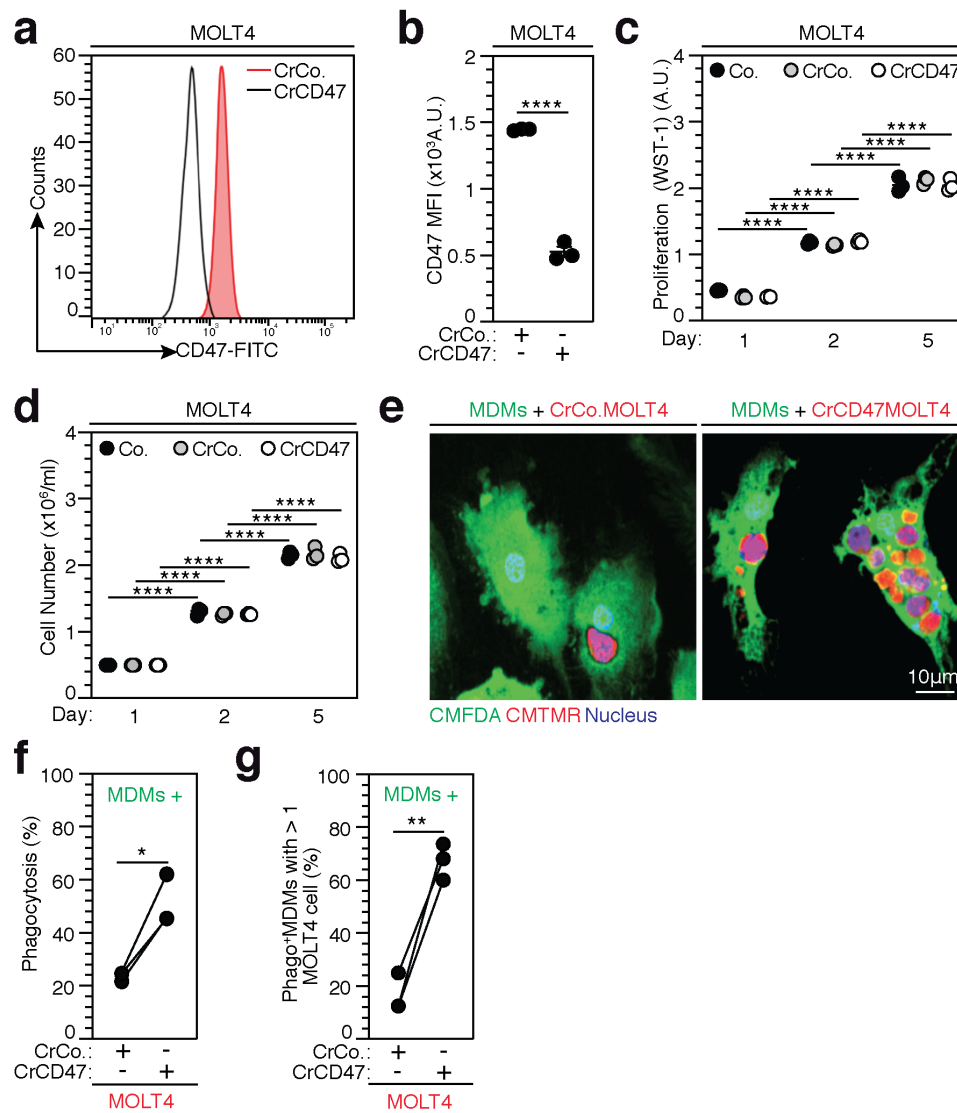

**Supplementary Fig. 2 CD47 is a key determinant of the phagocytosis of leukemic T cells by macrophages.** **a, b** FACS histograms (**a**) and cell-surface expression (MFI) (\*\*\*\* $p=2.1 \times 10^{-5}$ ) (**b**) of human CD47 (hCD47) on stable CD47-depleted (CrCD47MOLT4) or control (CrCo.MOLT4) MOLT4 cells obtained through transduction with lentiviral vectors encoding specific CD47 CRISPR guide RNAs (gRNAs) and the CAS9 gene or with control lentiviral vectors, respectively. **c, d**, Cell proliferation of CrCD47 and CrCo.MOLT4 cells assessed by a

WST-1 assay (\*\*\*\*p=6.2e-11, \*\*\*\*p=1.5e-11, \*\*\*\*p=5.1e-12, \*\*\*\*p=2.7e-12, \*\*\*\*p=4.9e-13, \*\*\*\*p=4.1e-12) (c) and viable cell number determination (\*\*\*\*p=1.1e-12, \*\*\*\*p=2.1e-12, \*\*\*\*p=2.1e-12, \*\*\*\*p=4.4e-13, \*\*\*\*p=1.8e-13, \*\*\*\*p=5.5e-13) (d) on d 1, 2 and 5. e Confocal micrographs of CMFDA-labeled MDMs and CMTMR-labeled CrCD47 or CrCo.MOLT4 cells co-cultured for 8 h. f, g Percentages of phagocytosis of CrCD47 or CrCo.MOLT4 cells by MDMs after 8 h of coculture (\*p=0.0307) (f) and the related percentage of Phago<sup>+</sup> MDMs that engulfed more than one MOLT4 target cell (\*\*p=0.0056) (g). (a) and (e) are data representative of n=3 independent experiments and n=3 donors. In (b, c, d), the data are presented as the mean±SEM from n=3 independent experiments. In (f, g), the data are donor matched from n=3 donors. Exact p-values are indicated and determined with two-tailed unpaired t (b), two-tailed (f) and one-tailed (g) paired t, and two-way ANOVA with Tukey's multiple comparison (c, d) tests. Source data are provided as a Source Data file.

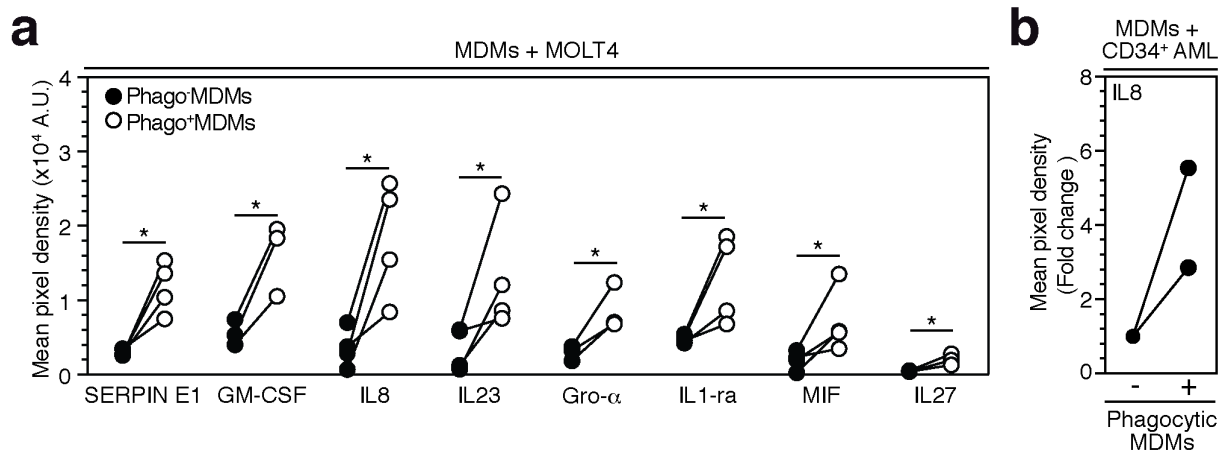

**Supplementary Fig. 3 Proinflammatory activation of phagocytic macrophages.** **a** Levels of secreted proinflammatory cytokines SERPIN E1, GM-CSF, IL8, IL23, Gro- $\alpha$ , IL1-ra, MIF and IL27 (\* $p=0.0143$ , \* $p=0.05$ , \* $p=0.0143$ , \* $p=0.0143$ , \* $p=0.05$ , \* $p=0.0143$ , \* $p=0.0143$ , \* $p=0.05$ , respectively) determined by a cytokine array at 96 h after sorting, in the cell supernatants of FACS-sorted Phago<sup>+</sup> MDMs or Phago<sup>-</sup> MDMs, as in **Fig. 1e**, which were obtained after 2 h of coculture of MDMs with MOLT4 cells. **b** Levels of secreted IL8, determined by a cytokine array at 96 h after sorting, in the cell supernatants of FACS-sorted Phago<sup>+</sup> MDMs or Phago<sup>-</sup> MDMs, as in **Fig. 1e**, which were obtained after 2 h of coculture of MDMs with CD34<sup>+</sup> blasts. In **(a)** and **(b)**, data are donor matched from (n=4 for SERPIN E1; n=3 for GM-CSF, Gro- $\alpha$  and IL27; n=4 for IL8, IL23, IL1-ra, MIF) and (n=2) donors. Exact p-values are indicated and determined with one-tailed unpaired Mann-Whitney **(a, b)** test. Source data are provided as a Source Data file.

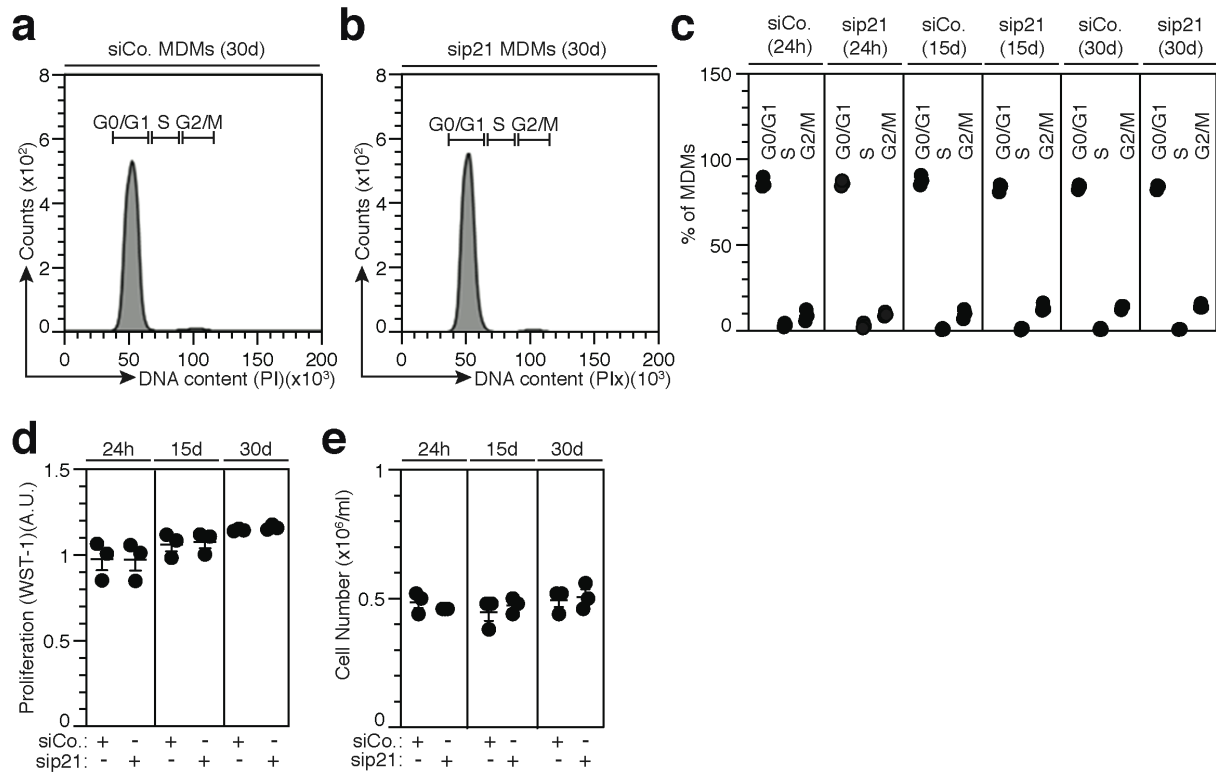

**Supplementary Fig. 4 p21 knockdown does not modulate the cell cycle progression, proliferation or viability of macrophages.** **a-c** FACS histograms (**a**, **b**) and percentages (**c**) of control (siCo.) or p21-knockdown (sip21) MDMs distributed in the G0/G1, S, G2/M phases of the cell cycle analyzed by DNA content staining with propidium iodide (PI) of, as shown in **Fig. 2a**, at 24 h, 15 d and 30 d after siRNA transfection. **d**, **e** Cell proliferation assessed by a WST-1 assay (**d**) and viability determined by measuring viable cell numbers (**e**) of siCo. or sip21 MDMs, as shown in **Fig. 2a**, at 24 h, 15 d and 30 d after siRNA transfection. In (**a**, **b**), data are representative of n=3 donors. In (**c**, **d**, **e**), the data are presented as the mean $\pm$ SEM from n=3 donors. Source data are provided as a Source Data file.

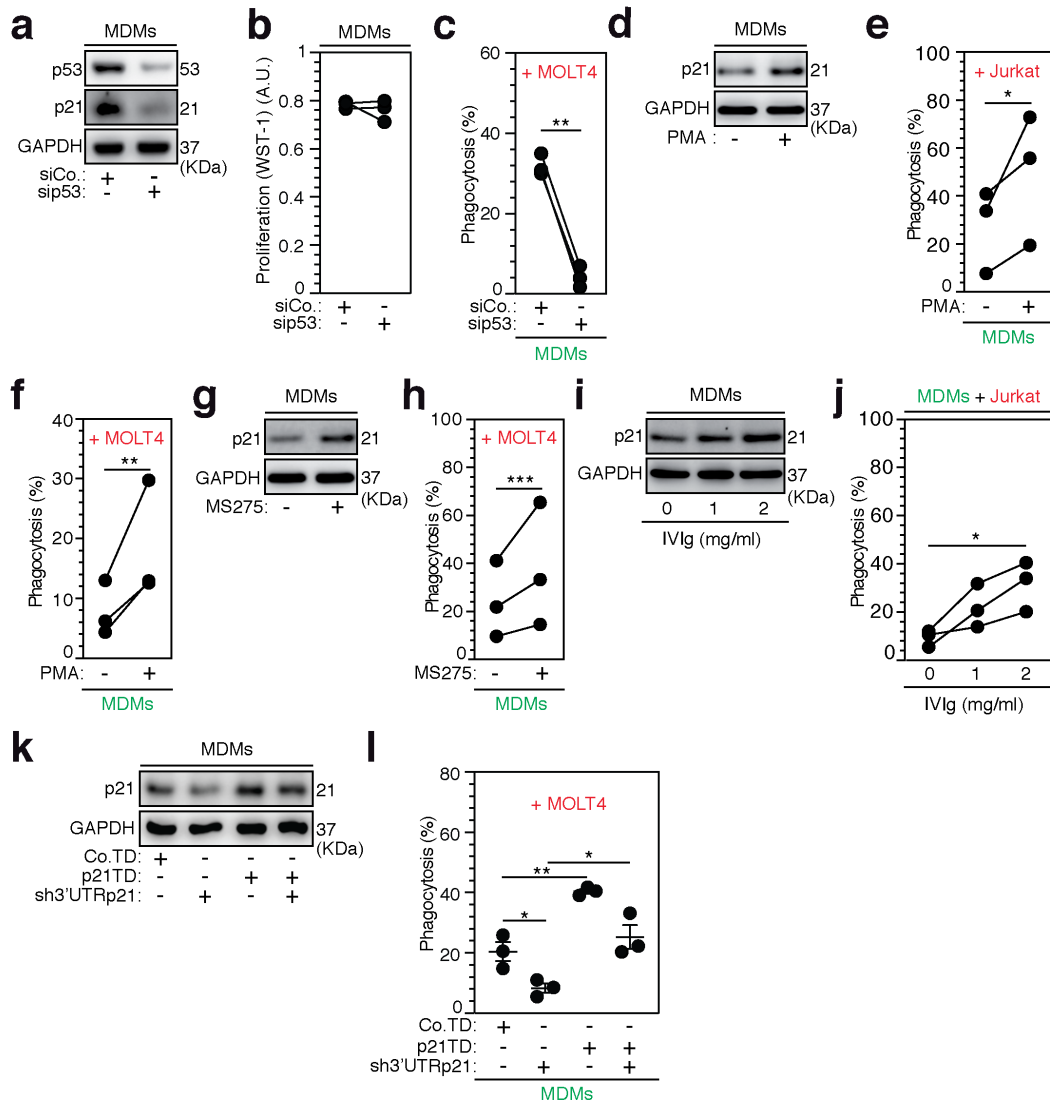

**Supplementary Fig. 5 p21 controls the phagocytosis of leukemic T cells.** **a, b** Expression of p53 and p21 determined by WB analysis (**a**) and cell proliferation assessed by a WST-1 assay (**b**) in control (siCo.) or p53-silenced (sip53) MDMs after 24 h siRNA transfection. **c**, Percentage of phagocytosis of MOLT4 cells by siCo. or sip53 MDMs detected after 8 h of coculture (\*\*p=0.001). **d** Expression of p21 in control- or PMA (30 ng/ml)-treated MDMs determined by WB analysis at 32 h. **e, f** Percentage of phagocytosis of Jurkat (\*p=0.0342) (**e**)

or MOLT4 (\*\*p=0.0079) (**f**) cells by PMA-pretreated MDMs detected after 8 h of coculture. **g** Expression of p21 in control- or MS275 (1  $\mu$ M)-treated MDMs determined by WB analysis at 32 h. **h** Percentage of phagocytosis of MOLT4 cells by MS275-pretreated MDMs detected after 8 h of coculture (\*\*p=0.0007). **i** Expression of p21 by WB in control-treated or intravenous immunoglobulin (IVIg)-stimulated MDMs determined by WB analysis at 24h. **j** Percentage of phagocytosis of Jurkat cells by control-pretreated or IVIg-prestimulated MDMs detected after 8 h of coculture (\*p=0.044). **k** Expression of p21 in MDMs transduced with control (Co.TD) lentiviral vectors, p21-encoding (p21TD) lentiviral vectors and/or lentiviral vectors encoding p21 short hairpin RNA targeting the 3' untranslated region of the p21 gene-encoding (sh3'UTRp21) at 72 h after transduction. **l** Percentage of phagocytosis of MOLT4 cells by the indicated transduced MDMs shown in (**k**) after 8 h of coculture (\*p=0.0462, \*\*p=0.045, \*p=0.0103). In (**a, d, g, i, k**), the data are representative of n=3 donors. In (**b, c, e, f, h, j**), the data are donor matched from n=3 donors. The data in (**l**) are presented as the mean $\pm$ SEM from n=3 donors. Exact p-values are indicated and determined with two-tailed paired t test (**c**), one-tailed ratio-paired t test (**e, f, h**) and one-way (**j**) or two-way (**l**) ANOVA with Tukey's multiple comparison tests. Source data are provided as a Source Data file.

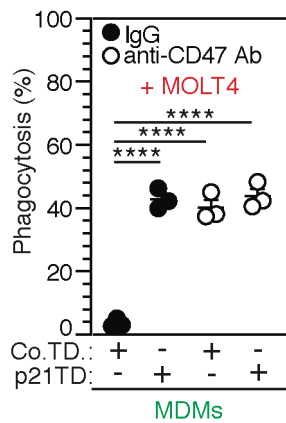

**Supplementary Fig. 6 CD47 blockade does not enhance the p21-mediated phagocytosis of MOLT4 cells.** The percentage of phagocytosis of MOLT4 cells by Co.TD-MDMs or p21TD-MDMs at 72 h after lentiviral transduction, as shown in **Fig. 2k**; the MDMs were precultured for 2 h in serum-free medium before the phagocytosis assay was performed with MOLT4 cells in the same medium for an additional 2 h in the presence of an isotype control (IgG) or anti-CD47 blocking antibody (B6H12.2 (7  $\mu$ g/ml) (from down to up: \*\*\*\* $p=3e-06$ ; \*\*\*\* $p=5e-06$ ; \*\*\*\* $p=3e-06$ ). The data are presented as the mean $\pm$ SEM from  $n=3$  donors. Exact  $p$ -values are indicated and determined with two-way ANOVA with Tukey's multiple comparison test. Source data are provided as a Source Data file.

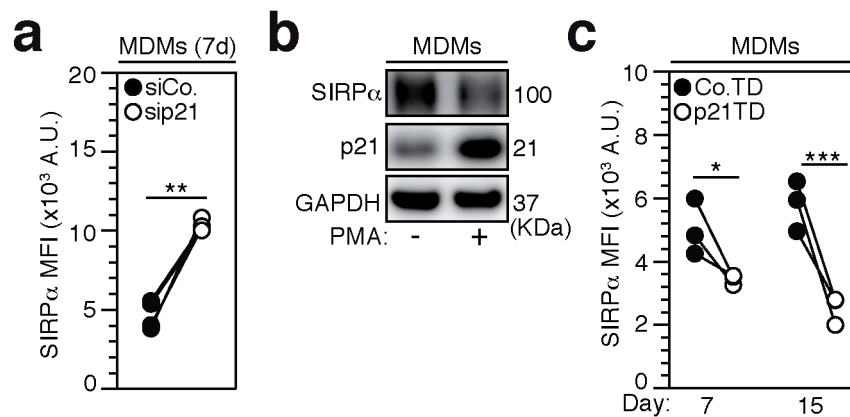

**Supplementary Fig. 7 p21 expression modulates SIRP $\alpha$  protein and membrane cell surface expression.** **a** SIRP $\alpha$  cell-surface expression of siCo. and sip21 MDMs, as shown in **Fig. 2h**, determined by FACS at 7 d after siRNA transfection (\*\* $p=0.0023$ ). **b** Expression of SIRP $\alpha$  and p21 in control- or PMA-treated (30 ng/ml) MDMs determined by WB analysis at 32 h. **c** SIRP $\alpha$  cell-surface expression of Co.TD-MDMs or p21TD-MDMs, as shown in **Fig. 2k**, determined by FACS at 7 d and 15 d after lentiviral transduction (\* $p=0.0333$ , \*\*\* $p=0.0005$ ). In **(b)**, the data are representative of  $n=3$  donors. In **(a)** and **(c)**, the data are donor matched from  $n=4$  and  $n=3$  donors. Exact  $p$ -values are indicated and determined with a two-tailed paired  $t$  test **(a)** and two-way ANOVA with Sidak's multiple comparison **(c)** test. Source data are provided as a Source Data file.



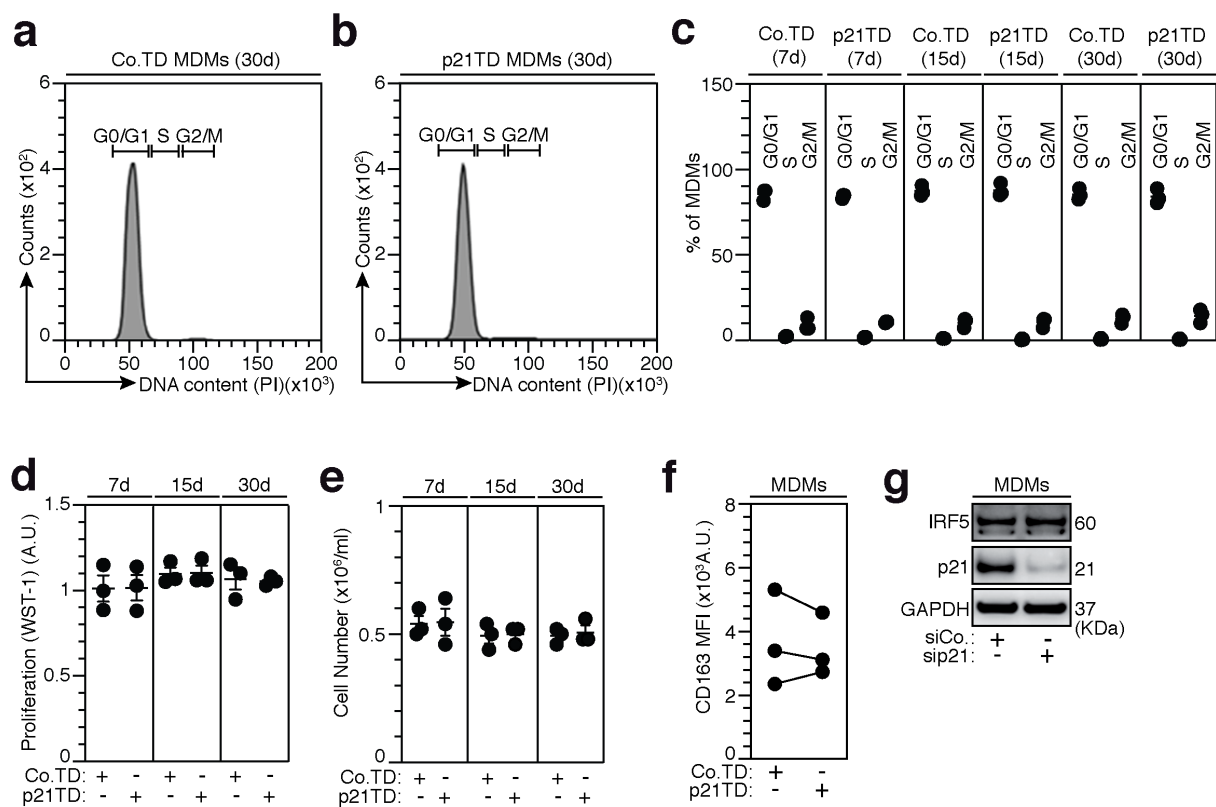

**Supplementary Fig. 8 Macrophages derived from p21-expressing genetically engineered monocytes, do not exhibit changes in their cell cycle progression, viability, proliferation or pro-inflammatory activation status. a-c** FACS histograms (**a**, **b**) and percentages (**c**) of MDMs derived from Co.TD or p21TD genetically engineered monocytes by differentiation for 7 d distributed in the G0/G1, S, G2/M phases of the cell cycle analyzed by DNA content staining with propidium iodide, as shown in **Fig. 2q**, at 7 d, 15 d and 30 d after lentiviral transduction. **d**, **e** Cell proliferation assessed by a WST-1 assay (**d**) and viability determined by measuring viable cell numbers (**e**) of Co.TD-MDMs or p21TD-MDMs, as shown in **Fig. 2q**, at 7 d, 15 d and 30 d after lentiviral transduction. **f** CD163 membrane expression (MFI) of Co.TD-MDMs or p21TD-MDMs, as shown in **Fig. 2q**, determined by FACS at 11 d after lentiviral transduction. **g** Expression of IRF5 and p21 in control-treated (siCo.) or p21-silenced (sip21) MDMs determined by WB analysis at 24 h after siRNA transfection. In (**a**, **b**,

**g)**, the data are representative of  $n=3$  donors. In **(c, d, e)**, the data are presented as the  $\text{mean} \pm \text{SEM}$  from  $n=3$  donors. In **(f)**, the data are donor matched from  $n=3$  donors. Source data are provided as a Source Data file.

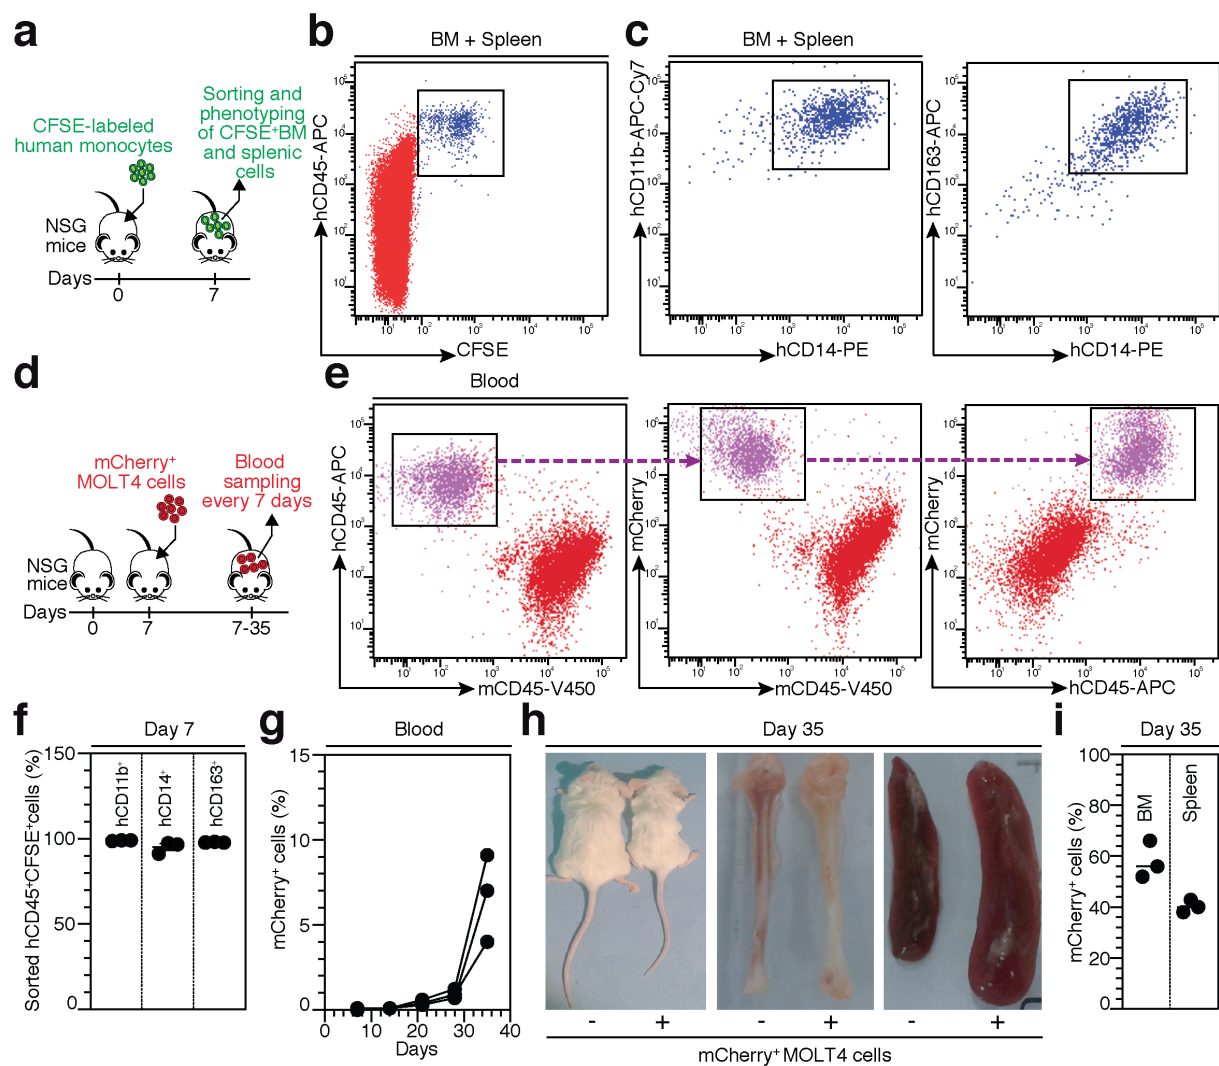

**Supplementary Fig. 9 Establishment of the adoptive transfer protocol for human monocytes and a mouse model of human T-ALL.** **a** Schematic representation of the protocol for the adoptive transfer of CFSE-labeled human monocytes via IV injections into NSG mice previously treated with total body irradiation (TBI), followed by sorting and immunophenotyping of CFSE<sup>+</sup> cells obtained from the bone marrow (BM) and spleen for human macrophage markers 7 d after monocyte transfer. **b**, **c** FACS dot plots of sorted CFSE<sup>+</sup> cells expressing the human leukocyte marker CD45 (hCD45) (**b**) in the BM and spleen of engrafted mice and the expression of the indicated human macrophage markers (**c**). **d** Schematic representation of the protocol for the engraftment of mCherry<sup>+</sup> MOLT4 cells into

NSG mice previously treated with TBI, including weekly peripheral blood sampling and FACS detection of leukemia cells. **e**, FACS dot plots showing the detection of mCherry<sup>+</sup> MOLT4 cells expressing hCD45, but not murine CD45 (mCD45)-expressing cells in the peripheral blood of engrafted mice at 35 d after leukemia cell injection. **f** Percentages of sorted hCD45<sup>+</sup>CFSE<sup>+</sup> cells in **(b)** and **(c)** expressing the indicated macrophage markers. **g** Percentages of mCherry<sup>+</sup> MOLT4 cells detected at the indicated time points in the peripheral blood of mice engrafted as in **(d)**. **h** Photographs of NSG mice engrafted (+) or not (-) with mCherry<sup>+</sup> MOLT4 cells, as in **(d)**, and their corresponding BM and spleen 35 d after leukemia cell injection. **i**, Percentages of mCherry<sup>+</sup> MOLT4 cells in the BM and spleen of engrafted NSG mice. In **(b, c, e, h)**, the data are representative of n=3 mice. In **(f, j)**, the data are presented as the mean±SEM from n=3 mice. In **(g)**, the data are mouse matched from n=3 mice. Source data are provided as a Source Data file.

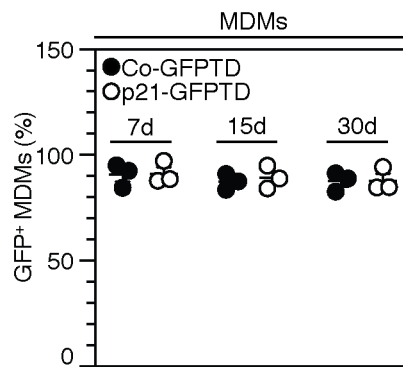

**Supplementary Fig. 10 Lentiviral transduction efficiency of MDMs derived from Co.TD-Mos or p21TD-Mos.** Percentage of live GFP-positive expressing MDMs (GFP<sup>+</sup> MDMs) derived *in vitro* from monocytes transduced with lentiviral vectors encoding p21 and GFP cDNAs (pp21-GFP) or a control vector (pCo-GFP), using the lentiviral transduction experimental procedure used for Co.TD-Mos and p21TD-Mos, and determined using immunofluorescence microscopy at d 7, 15 and 30 after transduction. The data are presented as the mean±SEM from n=3 donors. Source data are provided as a Source Data file.

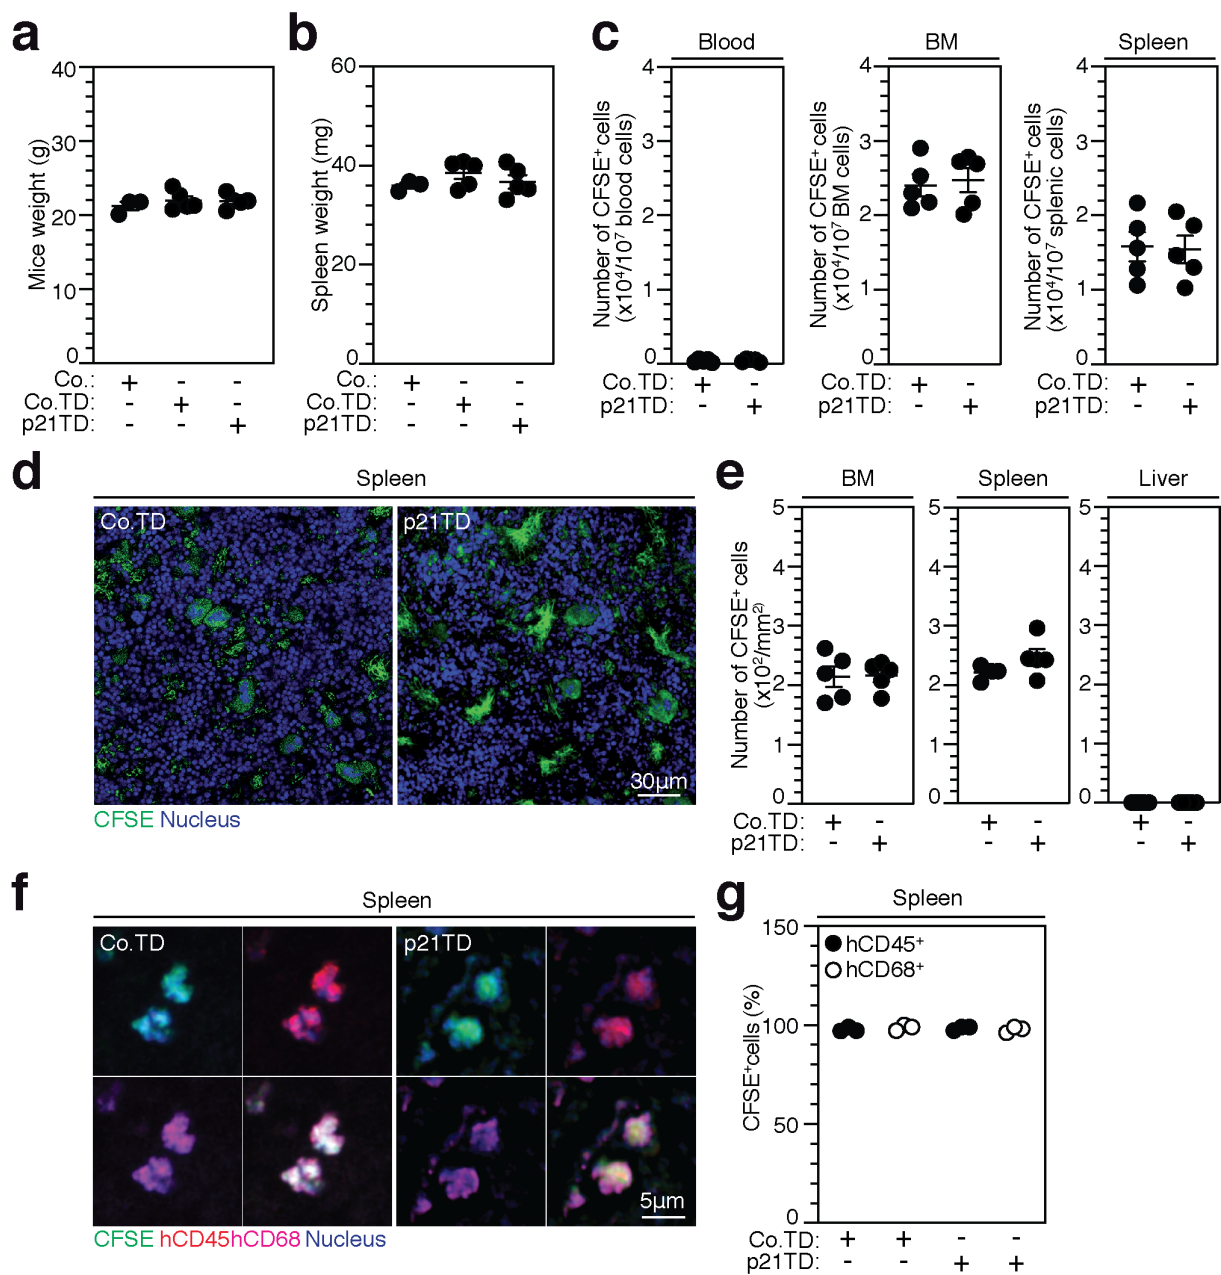

**Supplementary Fig. 11 Biological parameters associated with p21TD-Mo-based therapy for human T-ALL.** **a, b** Body (**a**) and spleen (**b**) weights of NSG mice infused with CFSE-labeled engineered monocytes (Mos) (Co.TD-Mos or p21TD-Mos) or controls (Co.). Weights were determined on d 21 after IV monocyte injection. **c** Numbers of CFSE<sup>+</sup> cells detected per 10<sup>7</sup> cells in the peripheral blood, bone marrow (BM) or spleen of mice (infused with CFSE-labeled Co.TD-Mos or p21TD-Mos) were determined by FACS at d 21 after Mo injection. **d**

Confocal micrographs showing CFSE<sup>+</sup> cells in the spleen of mice infused with CFSE-labeled Co.TD-Mos or p21TD-Mos at 21 d after Mo transfer. **e** Numbers of CFSE<sup>+</sup> cells in 1 mm<sup>2</sup> of BM, spleen or liver tissue obtained from mice infused with CFSE-labeled Co.TD-Mos or p21TD-Mos and imaged by confocal microscopy 21 d after Mo injection. **f, g** Confocal micrographs (**f**) and percentage (**g**) of CFSE<sup>+</sup> cells detected in mouse spleens evaluated 21 d after Mo transfer and expressing human leukocyte (hCD45) and human macrophage (hCD68) markers. In (**d**) and (**f**), the data are representative of n=5 and n=3 mice/group. In (**a, b**), the data are presented as the mean±SEM from n=3 mice for the Co. group and n=5 mice for the Co.TD and p21TD groups. In (**c, e**) and (**g**), the data are presented as the mean±SEM from n=5 and n=3 mice/group. Source data are provided as a Source Data file.

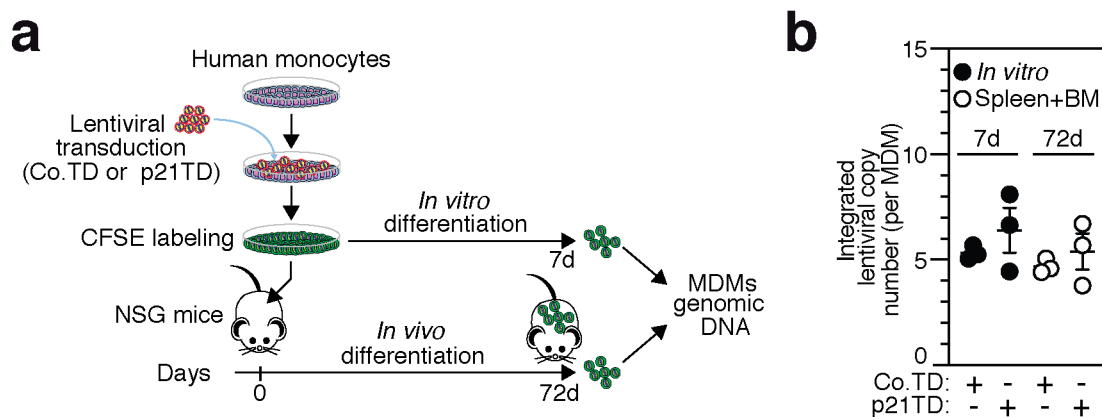

**Supplementary Fig. 12 Persistence of p21-engineered macrophages in tumor-free mice.**

**a, b** Schematic representation showing the experimental procedure used to analyze the persistence of p21-engineered macrophages (**a**), and quantification of integrated lentiviral copy numbers per MDM (**b**) among MDMs derived from Co.TD-Mos or p21TD-Mos that were either differentiated *in vitro* for 7 d or sorted ( $hCD45^+hCD11b^+hCD71^+hCD14^+$ ) from the BM and spleen on d 72 after adoptive transfer into tumor-free NSG mice. Integrated lentiviral copy numbers were determined from genomic DNA analyzed by qPCR. In (**b**), the data are presented as the mean $\pm$ SEM from n=3 donors (*in vitro*) and n=3 mice/group (*in vivo*). Source data are provided as a Source Data file.



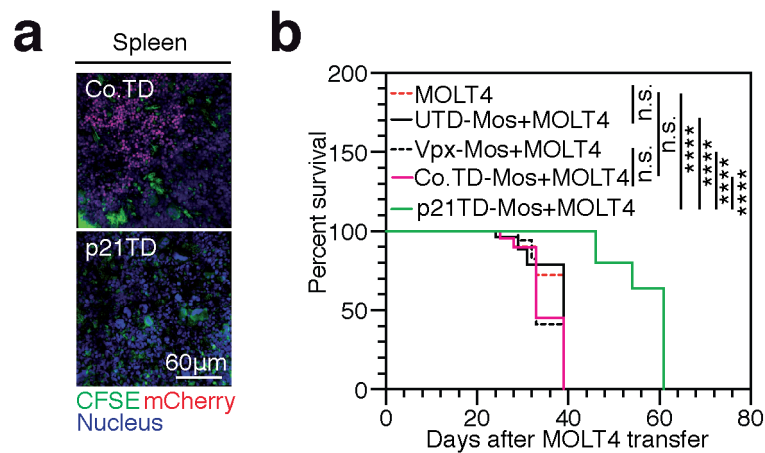

**Supplementary Fig. 13 p21TD-Mo-based therapy reduces the leukemic burden and prolongs survival in the human T-ALL model. a** Confocal micrographs showing mCherry<sup>+</sup> MOLT4 cells and CFSE<sup>+</sup> cells in the spleen of engrafted NSG mice 21 d after Mo transfer, as shown in **Fig. 3a**. **b** Survival of mCherry<sup>+</sup> MOLT4 cell-engrafted NSG mice not treated with adoptive transfer or adoptively transferred, as in **Fig. 3a**, with untransduced Mos (UTD-Mos), Vpx viral-like particle-treated Mos (Vpx-Mos), Co.TD-Mos or p21TD-Mos (from up to down: p=0.8831 (n.s.), p=0.8632 (n.s.), p=0.5617 (n.s.), \*\*\*\*p=1.1e-05, \*\*\*\*p=1.1e-05, \*\*\*\*p=2.2e-06, \*\*\*\*p=4.6e-06). In **(a)**, the data are representative of n=5 mice/group. In **(b)**, the survival data represent n=5 mice/group. Exact p-values are indicated and determined with the log-rank Mantel-Cox **(b)** test. Source data are provided as a Source Data file.

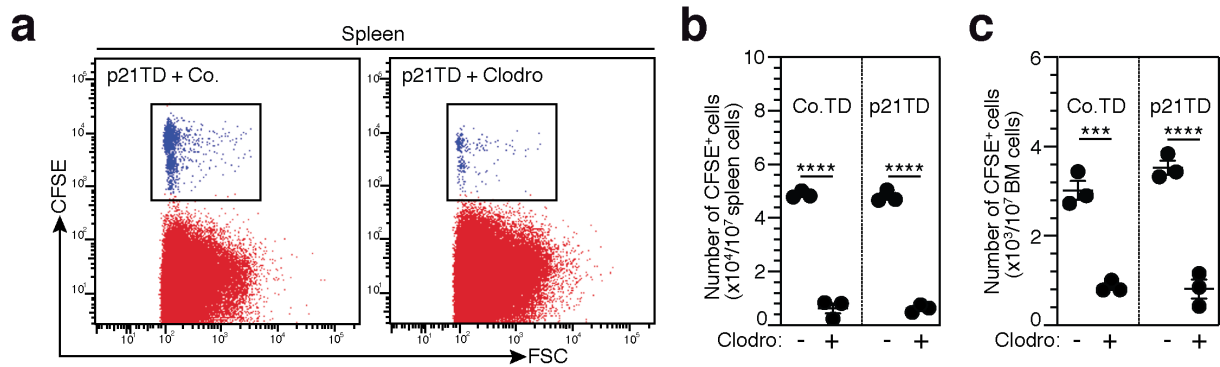

**Supplementary Fig. 14 Clodronate-containing liposome-mediated depletion of CFSE<sup>+</sup> Co.TD-Mo- and p21TD-Mo-derived macrophages.** **a** FACS dot plots of CFSE<sup>+</sup> spleen cells obtained from p21TD-Mo-transferred NSG mice, as in **Fig. 3a**, which were treated with control (Co.) or clodronate (Clodro)-containing liposomes 21 d after Mo transfer and assessed for specific depletion by FACS at 24 h after treatment. **b, c** Numbers of CFSE<sup>+</sup> cells detected per 10<sup>7</sup> cells from the spleen (\*\*\*\*p=4.1e-08, \*\*\*\*p=4.7e-08) (**b**) or bone marrow (BM) (\*\*p=0.0001, \*\*\*\*p=1.8e-05) (**c**) obtained from mice that received Co.TD-Mos or p21TD-Mos, as shown in **Fig. 3a**, and were treated with Co. or Clodro-containing liposomes 21 d after Mo transfer. The depletion of CFSE<sup>+</sup> cells at 24 d after liposomal treatment was evaluated by FACS. In (**a**), the data are representative of n=3 mice/group. In (**b, c**), the data are presented as the mean±SEM from n=3 mice/group. Exact p-values are indicated and determined with one-way ANOVA with Tukey's multiple comparison (**b, c**) test. Source data are provided as a Source Data file.

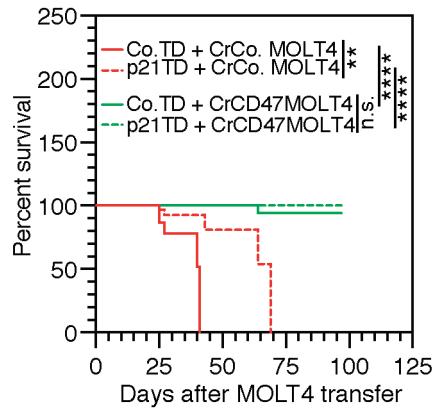

**Supplementary Fig. 15 CD47 expression dictates the survival of mCherry<sup>+</sup> MOLT4 cell-engrafted mice.** Survival of NSG mice engrafted with stable CD47-depleted (CrCD47MOLT4) or control (CrCo.MOLT4) MOLT4 cells that received Co.TD-Mos or p21TD-Mos (from left to right: \*\*p=0.0054, p=0.2781 (n.s.), \*\*\*\*p=7.8e-09, \*\*\*\*p=6.1e-06). The survival data are from n=5 mice/group. Exact p-values are indicated and determined with the log-rank Mantel-Cox test.

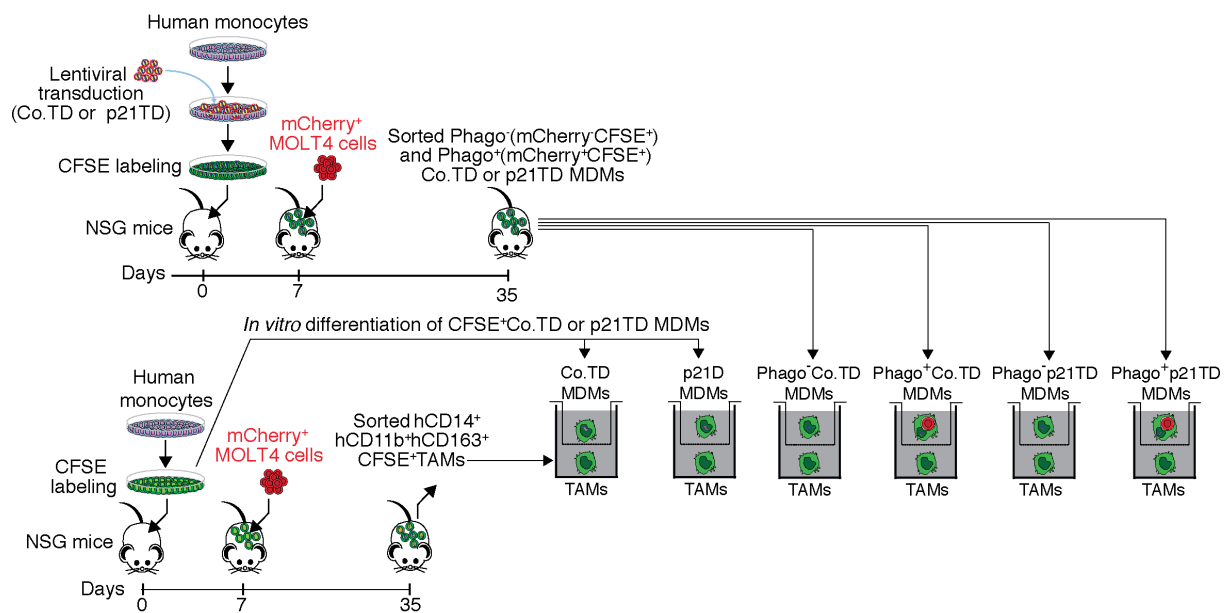

**Supplementary Fig. 16 p21TD-Mo-based therapy triggers proinflammatory reprogramming of TAMs in the human T-ALL model.** Schematic representation showing the experimental procedure used to determine the percentage of  $iNOS^+$  TAMs, using immunofluorescence microscopy (data shown in **Fig. 4f**).  $hCD14^+hCD11b^+hCD163^+$   $CFSE^+$  MDMs (TAMs) were sorted from the BM and spleen of  $mCherry^+$  MOLT4 cell-engrafted NSG mice by FACS at day 35 after human Mo transfer, and cocultured in the bottom chamber of Transwell devices with  $Phago^-$  MDMs or  $Phago^+$  MDMs (in the upper chambers), which were sorted from the BM and the spleen of  $mCherry^+$  MOLT4 cell-engrafted NSG mice adoptively transferred with Co.TD-Mos or p21TD-Mos (cells collected at 35 d after Mo transfer). Control TAMs were cocultured with Co.TD-MDMs or p21TD-MDMs obtained by *in vitro* differentiation of Co.TD-Mos or p21TD-Mos. After 15 d of coculture, the percentage of  $iNOS^+$  TAMs was determined by immunofluorescence staining and microscopy. Source data are provided as a Source Data file.

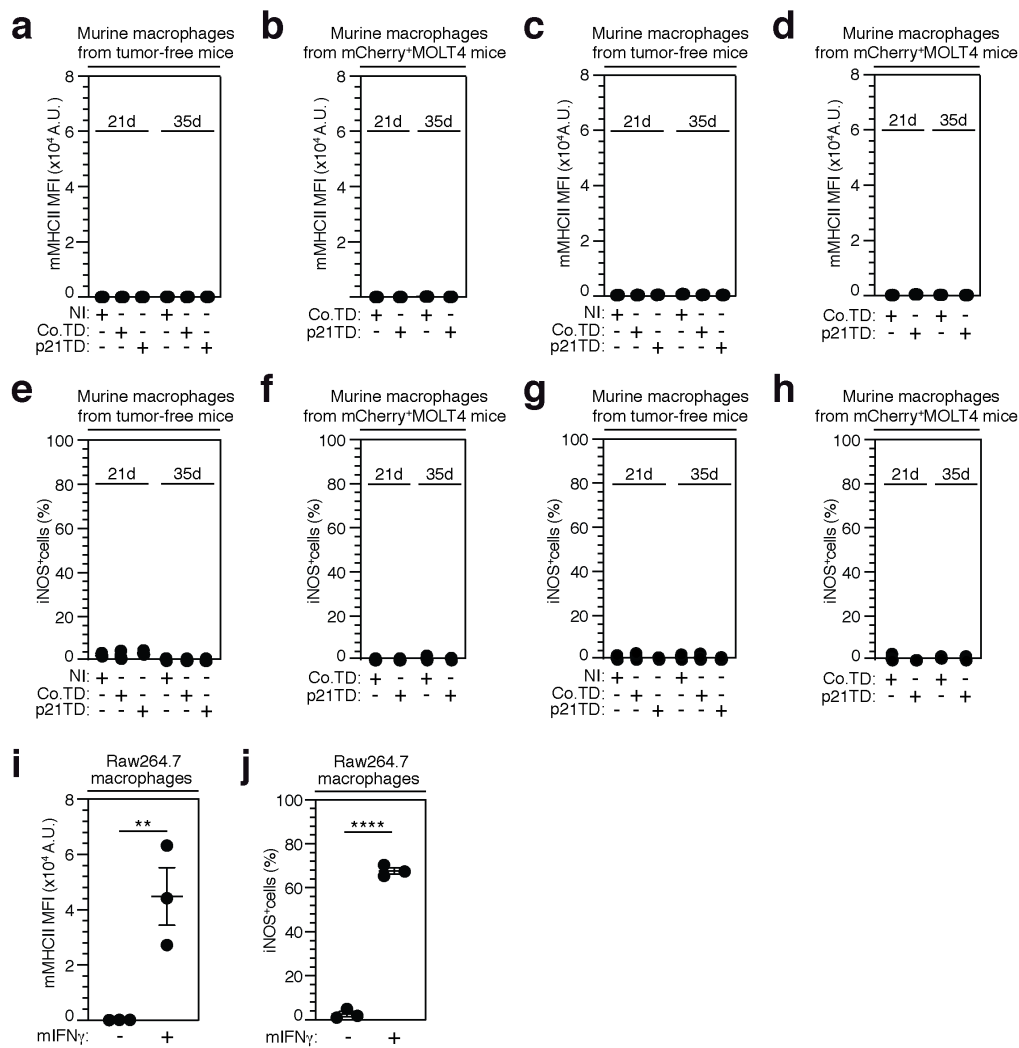

**Supplementary Fig. 17 p21TD-Mo-based therapy does not trigger the proinflammatory activation of murine macrophages in the human T-ALL model. a-j** Cell-surface expression (MFI) of murine MHCII (mMHCII) and the percentage of cells expressing iNOS (iNOS<sup>+</sup>) were analyzed by FACS (**a-d**) and immunofluorescence staining and microscopy (**e-h**) of murine macrophages (mCD45<sup>+</sup>mF4/80<sup>+</sup>). Murine macrophages were sorted from the BM (**a, b, e, f**) and the spleen (**c, d, g, h**) of tumor-free (**a, c, e, g**) or mCherry<sup>+</sup> MOLT4 cell-engrafted (**b, d, f, h**) NSG mice on d 21 and d 35 after adoptive transfer of Co.TD-Mos or p21TD-Mos or harvested from mice not treated with infusion (NI). Proinflammatory activated murine Raw264.7 macrophages treated with murine IFN $\gamma$  (mIFN $\gamma$ ) (1  $\mu$ g/ml) for 48 h were

used as positive controls for mMHCI ( \*\*p=0.0063) (i) and iNOS ( \*\*\*\*p=3.6e-05) (j) staining. In (a-h) and (i, j), the data are presented as the mean±SEM from n=3 mice/group and n=3 independent experiments. Exact p-values are indicated and determined with one-tailed (i) and two-tailed (j) unpaired t tests. Source data are provided as a Source Data file.

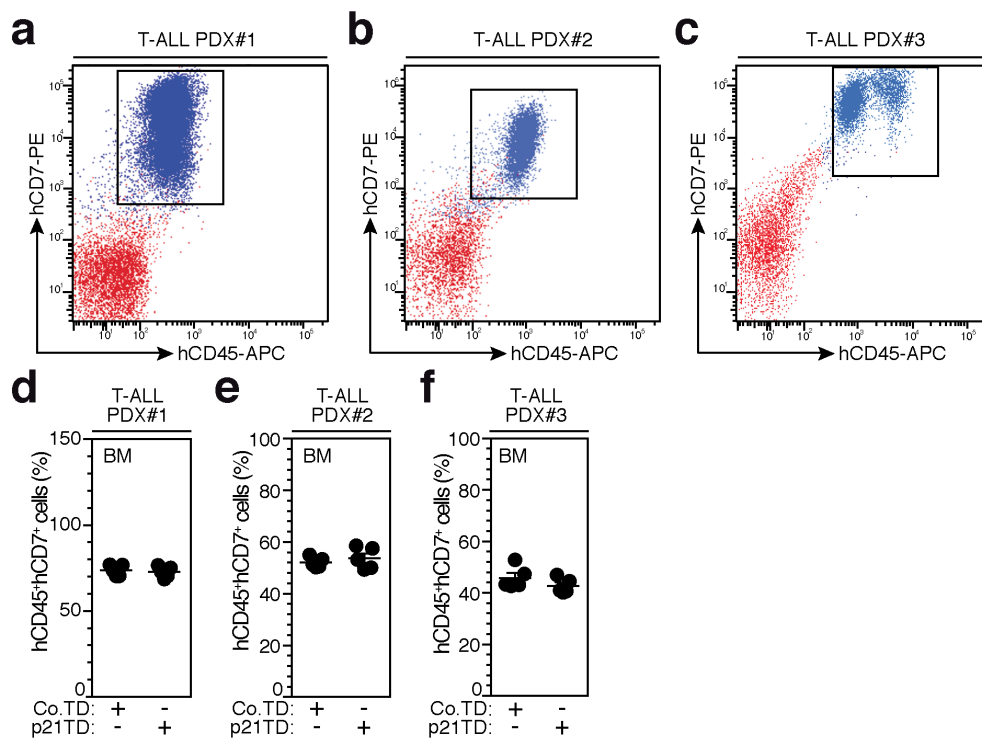

**Supplementary Fig. 18 Characterization of bone marrow invasion in mice engrafted with diagnosed or relapsed T-ALL-derived PDXs.** **a-c** FACS dot plots showing the bone marrow invasion in mice engrafted with T-ALL PDX#1 (**a**), PDX#2 (**b**) or PDX#3 (**c**), as shown in **Fig. 5a**. PDX#1 and PDX#2 were from the same patient but isolated at the diagnosis and relapse stages, respectively. Bone marrow (BM) invasion was assessed by FACS detection of human leukocyte (hCD45) and T-ALL (hCD7) markers 24 h before adoptive transfer of Co.TD-Mos or p21TD-Mos. **d-f** The percentages of hCD45<sup>+</sup>hCD7<sup>+</sup> cells detected in the BM of mice engrafted with T-ALL PDX#1 (**d**), PDX#2 (**e**) or PDX#3 (**f**), as shown in **Fig. 5a**, were determined by FACS 24 h before adoptive transfer of Co.TD-Mos or p21TD-Mos. In (**a, b, c**), the data are representative of n=10 mice. In (**d, e, f**), the data are presented as the mean±SEM from n=5 mice/group. Source data are provided as a Source Data file.

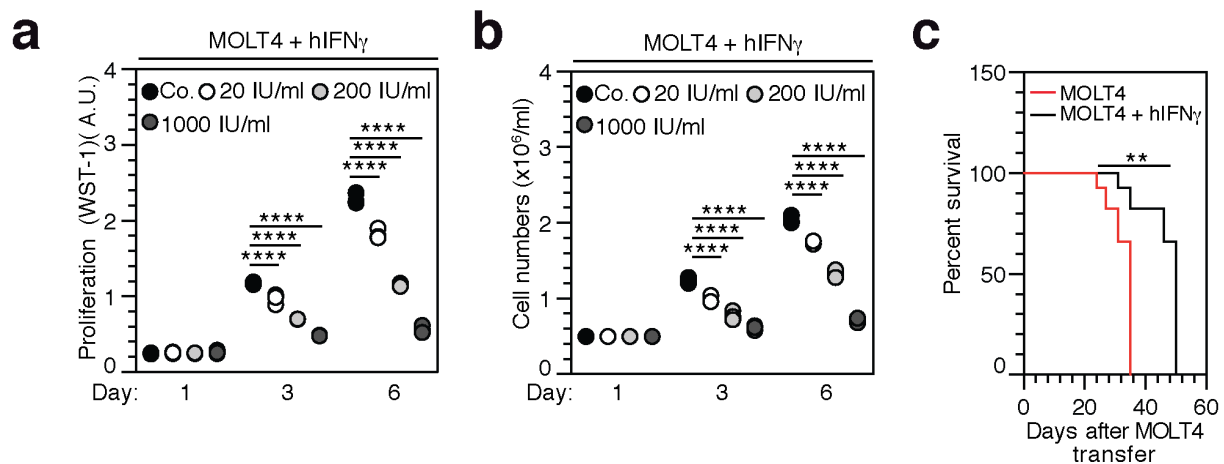

**Supplementary Fig. 19 IFN $\gamma$  reduces the viability of MOLT4 leukemia cells and prolongs the survival of mCherry<sup>+</sup> MOLT4 cell-engrafted NSG mice. a, b** Cell proliferation (using a WST-1 assay (from left to right: \*\*\*\*p=7.5e-05, \*\*\*\*p=9e-12, \*\*\*\*p=1.9e-14, \*\*\*\*p=1.2e-11, \*\*\*\*p=1.8e-14 and \*\*\*\*p=1.8e-14)) (**a**) and viability (viable cell counts) (from left to right: \*\*\*\*p=3.8e-07, \*\*\*\*p=1.5e-12, \*\*\*\*p=1.9e-14, \*\*\*\*p=1e-08, \*\*\*\*p=1.8e-14 and \*\*\*\*p=1.8e-14)) (**b**) of MOLT4 cells treated (or not) with the indicated hIFN $\gamma$  concentrations (in International Units/ml (IU/ml)) and during the indicated times are shown. **c** Survival of mCherry<sup>+</sup> MOLT4 cell-engrafted NSG mice treated (or not) with hIFN $\gamma$  (10  $\mu$ g/mouse) on d 7 after leukemia cell engraftment (\*\*p=0.0028). In (**a, b**), the data represent the mean $\pm$ SEM from n=3 independent experiments. In (**c**), the survival data are from n=5 mice/group. Exact p-values are indicated and determined with two-way ANOVA with Tukey's test (**a, b**) and the log-rank Mantel-Cox (**c**) test. Source data are provided as a Source Data file.



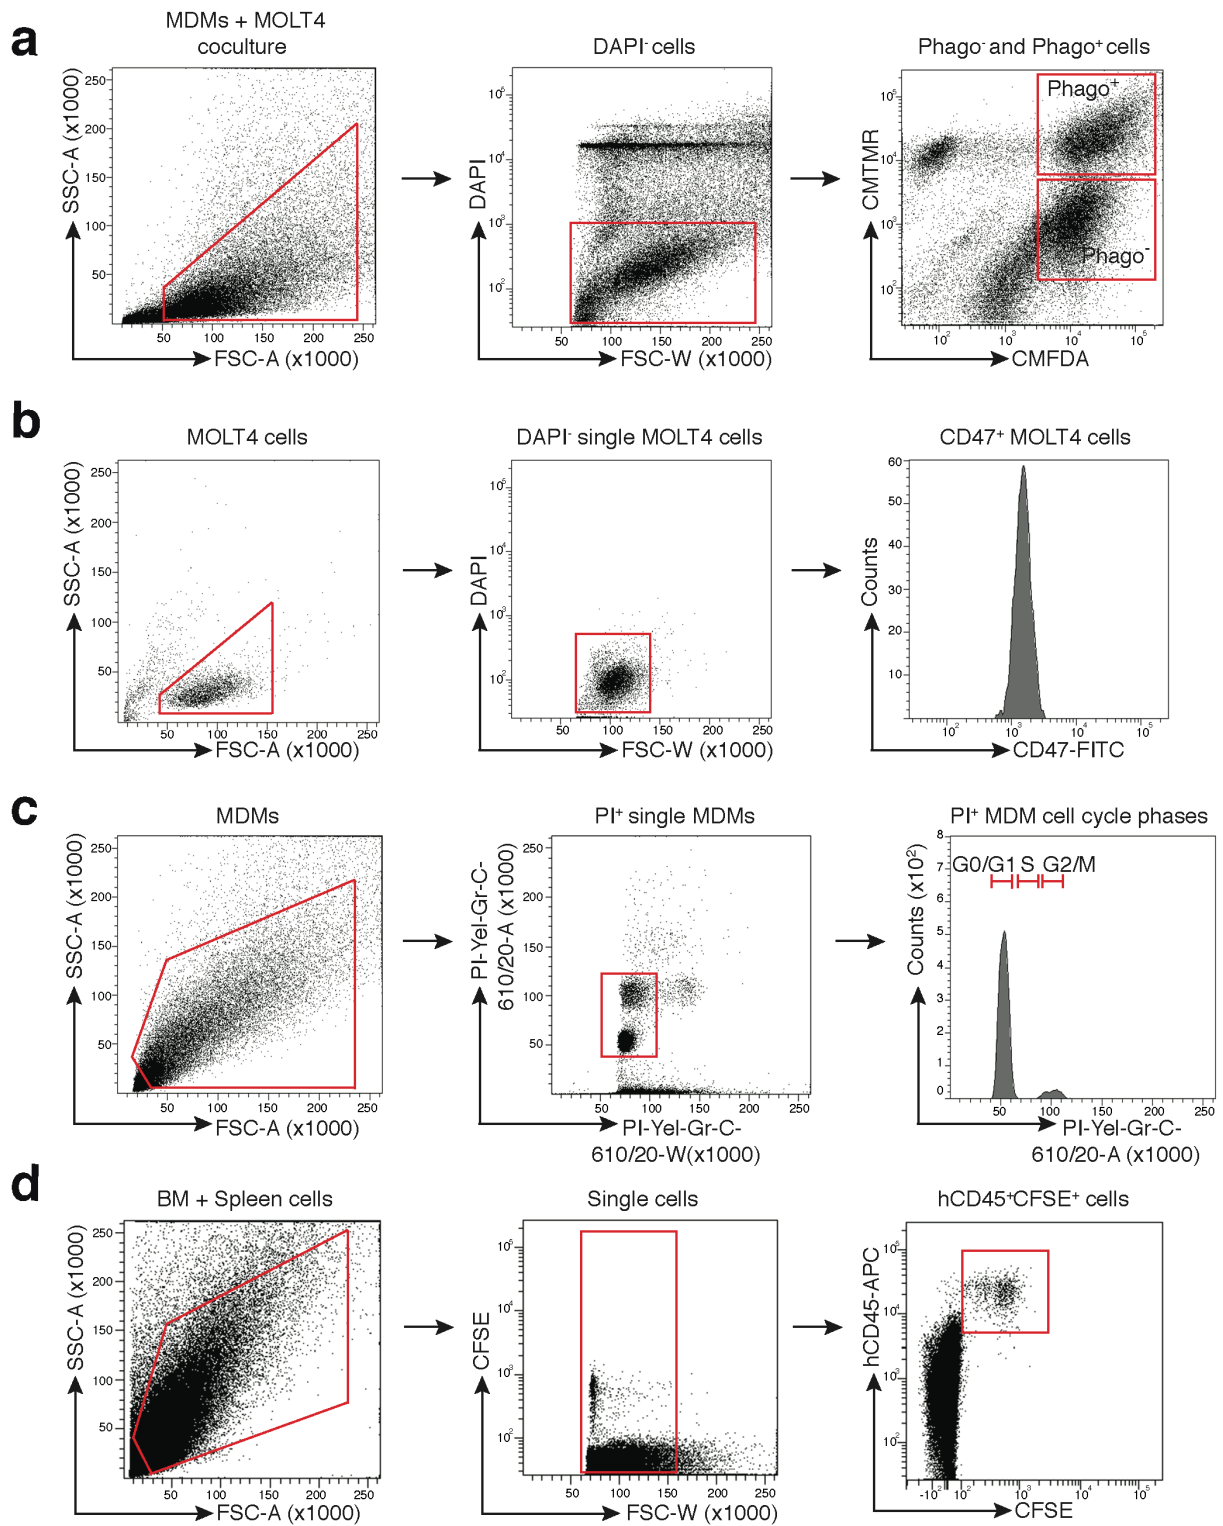

**Supplementary Fig. 20. Representative sequential FACS sorting/gating strategies. a** Representative FACS sorting strategy for **Fig. 1 e**. **b** Representative FACS gating strategy for **Supplementary Fig. 2a**. **c** Representative FACS gating strategy for **Supplementary Fig. 4a**,

**b** and **Supplementary Fig. 8a, b, d** Representative FACS sorting strategy for **Supplementary Fig. 9b**.

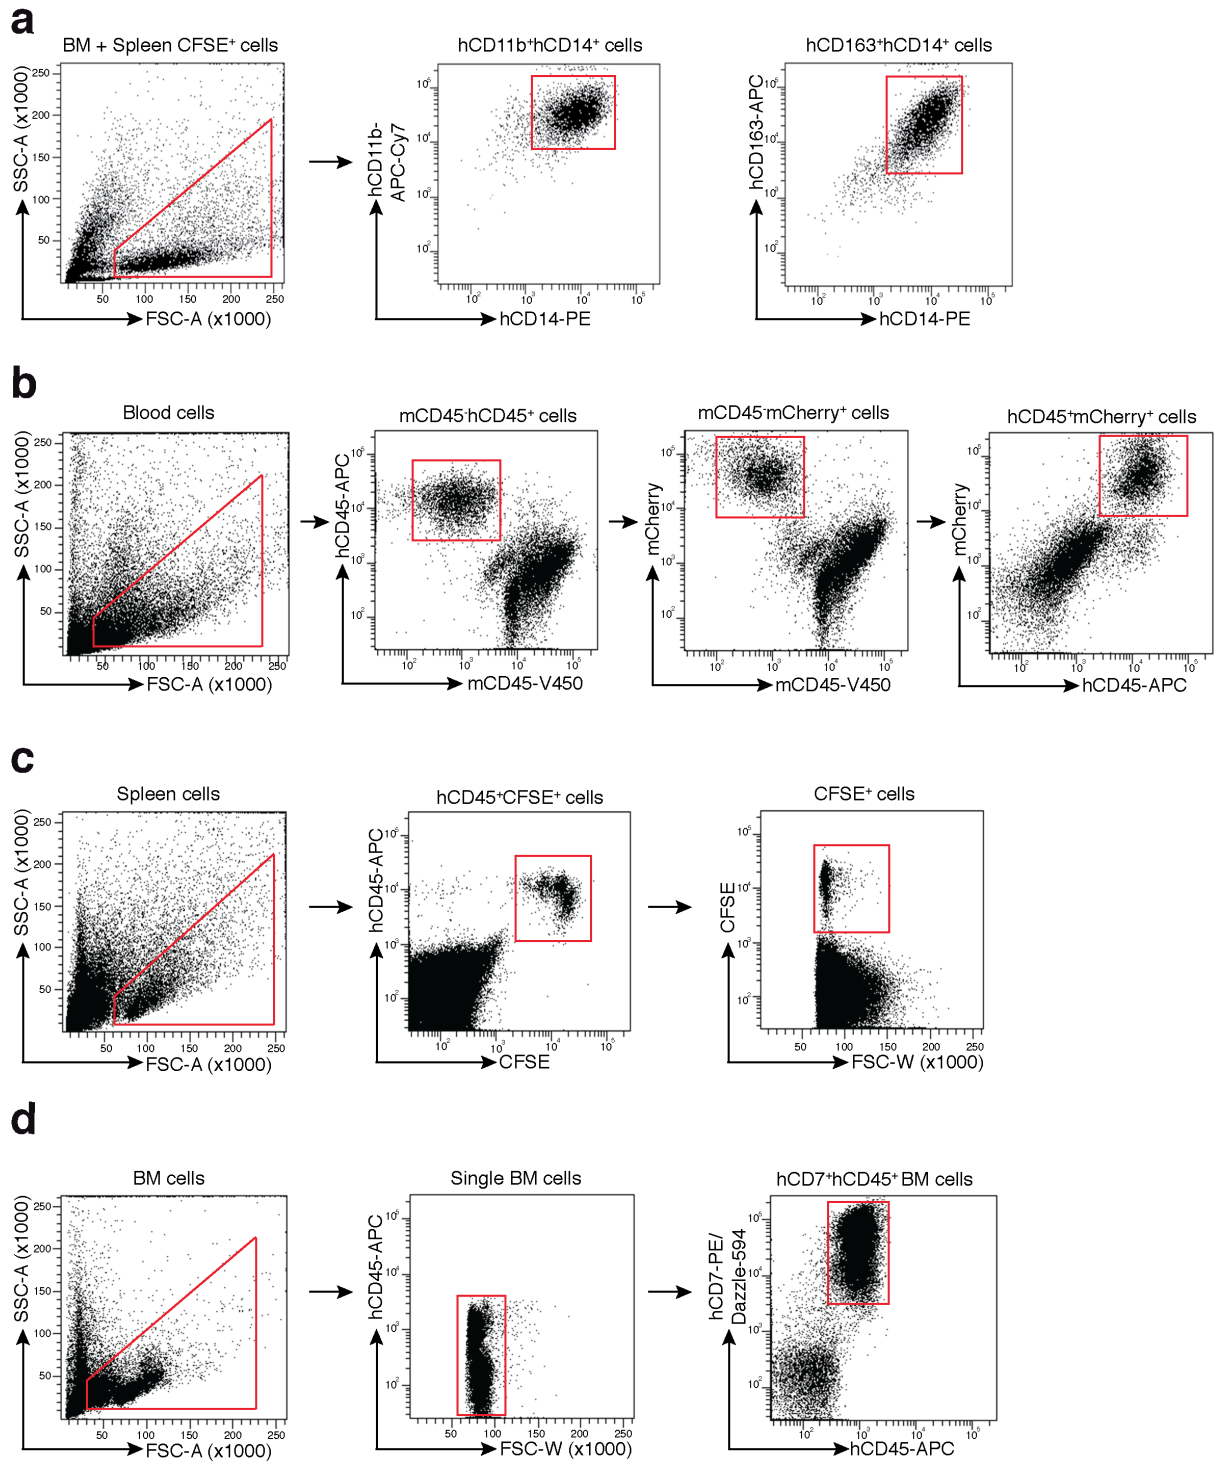

**Supplementary Fig. 21. Representative sequential FACS gating strategies. a** Representative FACS gating strategy for **Supplementary Fig. 9c. b** Representative FACS

gating strategy for **Supplementary Fig. 9e**. **c** Representative FACS gating strategy for **Supplementary Fig. 14a**. **d** Representative FACS gating for **Supplementary Fig. 18a, b, c**.

**Supplementary Table 1** Characteristics of AML patients providing the CD34<sup>+</sup> cells used in this study.

|   | Age at sampling time (years) | Sex   | WHO diagnosis | WHO diagnosis before AML        | Sampled organs | WBC (10 <sup>9</sup> /L) | WBC monocytes (10 <sup>9</sup> /L) | Blasts in BM (%) | Karyotypes                                                                                                    | Additional gene mutations         | Multi-agent received treatments                                |
|---|------------------------------|-------|---------------|---------------------------------|----------------|--------------------------|------------------------------------|------------------|---------------------------------------------------------------------------------------------------------------|-----------------------------------|----------------------------------------------------------------|
| 1 | 73                           | Men   | AML           | CMML                            | PB             | 17.70                    | 5                                  | 79               | 46,XY[20]                                                                                                     | <i>TET2, RUNX1 SRSF2</i>          | Hydroxyurea<br>Hypomethylating agent 5 (HMA)<br>Low cytarabine |
| 2 | 87                           | Woman | AML           | MDS (RAEB)                      | BM             | 68.20                    | 12.96                              | 20               | 46, XX[20]                                                                                                    | n.d.                              | Erythropoietin<br>Hypomethylating agent 5 (HMA)                |
| 3 | 69                           | Men   | AML           | CMML                            | PB             | 28                       | 5.32                               | 38               | 46, XY, del(20) (q11q13) [44]/46, sl, t(8; 21) (q22; q22) [5]/46, sd11, der (22) t(8; 22) (q21-q22; p12) [11] | <i>ASXL1, SRSF2</i>               | Hypomethylating agent 5 (HMA)<br>AML-type chemotherapy         |
| 4 | 65                           | Men   | AML           | CMML                            | PB             | 17.9                     | 5.7                                | 25               | 46, XY [20]                                                                                                   | <i>RUNX1, ASXL1, ZRSR2, CSF3R</i> | AML-type chemotherapy<br>Hypomethylating agent 5 (HMA)         |
| 5 | 76                           | Men   | AML           | None                            | BM             | 36.40                    | 6.55                               | 59               | 46, XY[20]                                                                                                    | n.d.                              | Hydroxyurea                                                    |
| 6 | 68                           | Men   | AML           | MPN<br><i>Polycythemia vera</i> | PB             | 43                       | 5.59                               | 64               | 46, XY[22]                                                                                                    | <i>JAK2</i>                       | Hypomethylating agent 5 (HMA)                                  |

WHO: World health organization; AML: Acute myeloid leukemia; CMML: Chronic myelomonocytic leukemia; MDS: Myelodysplastic syndromes; RAEB: Refractory anemia with excess of blasts; MPN: Myeloproliferative neoplasms; WBC: Whole blood cells; PB: peripheral blood; BM: Bone marrow; del: deletion; sl: stemline; sd: sideline ; der: derived; t: translocation; n.d.: not determined.

**Supplementary Table 2** Characteristics of the T-ALL patients providing the PDX cells used in this study.

| Patients | Age at sampling time (years) | Sex | WHO diagnosis | Karyotypes                                                                                                                  | Additional gene mutations                                                                                                                                                                                        | Multi-agent received treatments                                                                            |
|----------|------------------------------|-----|---------------|-----------------------------------------------------------------------------------------------------------------------------|------------------------------------------------------------------------------------------------------------------------------------------------------------------------------------------------------------------|------------------------------------------------------------------------------------------------------------|
| PDX#1    | 16                           | M   | T-ALL         | 46,XY,t(11;14)(p13;q11),add(13)(p11)[8]/46,XY[19]<br>.nuc ish(ABL1,BCR)x2[200],(TCRADx2)(5'TCRAD<br>sep 3'TCRADx1)[117/200] | IL7R <sup>μ</sup><br>NOTCH1 <sup>μ</sup>                                                                                                                                                                         | None                                                                                                       |
| PDX#2    | 17                           | M   | T-ALL         | 46,XY,t(11;14)(p13;q11),add(13)(p11)[8]/46,XY[19]<br>.nuc ish(ABL1,BCR)x2[200],(TCRADx2)(5'TCRAD<br>sep 3'TCRADx1)[117/200] | IL7R <sup>μ</sup><br>NOTCH1 <sup>μ</sup><br>PTPRG <sup>del</sup><br>HOXA11 <sup>del</sup><br>CDKN2A <sup>del</sup><br>CDKN2B <sup>del</sup><br>TCRD <sup>del</sup><br>NF1 <sup>gain</sup><br>HLF <sup>gain</sup> | Daratumomab<br>Venetoclax<br>Dexamethasone<br>Nelarabine<br>Vincristine<br>Cytarabine<br>Etoposide<br>GCSF |
| PDX#3    | 6                            | F   | T-ALL         | 46,XX,t(11;14)(p13;q11)                                                                                                     | SIL-TAL1<br>CDKN2A <sup>del</sup><br>RB1 <sup>del</sup><br>NOTCH1 <sup>μ</sup>                                                                                                                                   | None                                                                                                       |

WHO: World health organization; T-ALL: T-Cell acute lymphoblastic leukemia; PDX: Patient derived Xenograft; M: Male; F: Female; t: translocation; del: deletion; add: addition; μ: mutation; nuc ish: nuclear in situ hybridization
