# Supplementary material for: CDKN1A is a target for phagocytosis-mediated cellular immunotherapy in acute leukemia
Source: PubMed Central journal article supplement (PMC9643439; doi:10.1038/s41467-022-34548-3), 2022-11-08
Supplement: 41467_2022_34548_MOESM3_ESM.pdf [file 41467_2022_34548_MOESM3_ESM.pdf]

## Description of Additional Supplementary Files

**Supplementary Data 1.** List of upregulated and downregulated genes in Phago+ MDMs as compared to Phago- MDMs (in Fig. 1j).
