# Supplementary material for: CDKN1A is a target for phagocytosis-mediated cellular immunotherapy in acute leukemia
Source: PubMed Central journal article supplement (PMC9643439; doi:10.1038/s41467-022-34548-3), 2022-11-08
Supplement: 41467_2022_34548_MOESM4_ESM.pdf [file 41467_2022_34548_MOESM4_ESM.pdf]

**Supplementary Data 1.** List of upregulated and downregulated genes in Phago<sup>+</sup> MDMs as compared to Phago<sup>-</sup> MDMs (in Fig. 1j).

| Accession number | Gene Name | Donor-1 Log2FC-1 | Donor-1 Log2FC-2 | Donor-2 Log2FC-1 | Donor-2 Log2FC-2 | Donor-3 Log2FC-1 | Donor-3 Log2FC-2 | Mean Log2FC  | Standard deviation | References |
|------------------|-----------|------------------|------------------|------------------|------------------|------------------|------------------|--------------|--------------------|------------|
| NM_001243962     | HLA-DQB1  | -0.581085461     | -0.51949771      | -0.543775531     | -0.402907544     | -0.900165827     | -0.901591057     | -0.641503862 | 0.209554892        |            |
| NM_001031804     | MAF       | -0.748971298     | -0.757355501     | -0.195699637     | -0.154685012     | -0.751059946     | -0.651663441     | -0.543239139 | 0.288053769        | 1          |
| NM_006895        | HNMT      | -1.153512746     | -1.312527881     | -0.182960439     | -0.14665632      | -0.728895472     | -0.878054827     | -0.733767947 | 0.485814816        | 2          |
| NM_002003        | FCN1      | -0.441026188     | -0.416885858     | -0.230801825     | -0.318938384     | -0.208387703     | -0.141453228     | -0.292915531 | 0.119938729        | 3          |
| NM_001946        | DUSP6     | -0.051145628     | -0.215729214     | -0.270050542     | -0.170089954     | -0.548420144     | -0.465961842     | -0.286899554 | 0.187098811        | 4          |
| NM_001001547     | CD36      | -0.495976027     | -0.52489668      | -0.493696546     | -0.487506267     | -0.550731852     | -0.520427366     | -0.51220579  | 0.024203199        | 2          |
| NM_033554        | HLA-DPA1  | -0.968770986     | -0.99228559      | -0.138121342     | 0.005934016      | -1.482841483     | -1.369283679     | -0.824228177 | 0.62288117         |            |
| NM_002122        | HLA-DQA1  | -0.852073536     | -0.773154495     | -0.635247778     | -0.765620669     | -0.972414139     | -0.997311877     | -0.832637082 | 0.1371314          |            |
| NM_153811        | SLC38A6   | -0.496021681     | -0.470885344     | -0.447700281     | -0.370343873     | -0.541073635     | -0.658669451     | -0.497449044 | 0.09719409         | 2          |
| NM_004244        | CD163     | -1.496105316     | -1.650303955     | -0.580943975     | -0.544766047     | -1.300798552     | -1.113780799     | -1.114449774 | 0.464046325        | 5          |
| NM_001150        | ANPEP     | -1.07333231      | -1.156206103     | -0.371499456     | -0.59527098      | -0.536939154     | -0.441411901     | -0.695776651 | 0.334583748        | 6          |
| NM_005623        | CCL8      | -0.763508565     | -0.788545586     | -0.906444943     | -0.667630277     | -0.564061212     | -0.508529916     | -0.69978675  | 0.148782288        |            |
| NM_018092        | NETO2     | -1.340147798     | -1.292177359     | -0.316902202     | -0.332758573     | -1.185540585     | -1.036854232     | -0.917396792 | 0.047690006        |            |
| NM_004235        | KLF4      | -0.52527327      | -0.430745078     | -0.28226564      | -0.08419777      | -0.137030314     | -0.170882209     | -0.270680056 | 0.173078469        | 7          |
| NM_138711        | PPARG     | -0.606230518     | -0.627521049     | -0.687632794     | -0.690680048     | -0.388590406     | -0.436133474     | -0.572798115 | 0.620928529        | 8          |
| NM_002124        | HLA-DRB1  | -0.631505148     | -0.612421789     | -0.371562307     | -0.344473955     | -0.986503653     | -0.936111262     | -0.647094852 | 0.271172379        |            |
| NM_019111        | HLA-DRA   | -0.394418097     | -0.417530794     | -0.302401288     | -0.32702838      | -0.619917993     | -0.524004868     | -0.43088357  | 0.12100183         |            |
| NM_002982        | CCL2      | -0.034458272     | -4.122824587     | -0.330785733     | -0.355001943     | -0.277198599     | -0.285232608     | -1.567583624 | 1.945470015        |            |
| NM_005755        | EBI3      | -0.49050625      | -0.628082925     | -0.164509195     | -0.211666767     | -0.881780624     | -0.913493255     | -0.548339836 | 0.320904403        |            |
| NM_001562        | IL18      | -0.296245809     | -0.343382573     | -0.1780507       | -0.167052357     | -0.45377753      | -0.444585523     | -0.313849082 | 0.124775453        | 9          |
| NM_002984        | CCL4      | -1.262445528     | -1.259288658     | -0.583295898     | -0.585440701     | -0.080994996     | -0.074718382     | -0.641030694 | 0.530880867        |            |
| NM_002852        | PTX3      | -2.690391917     | -2.724744491     | -1.292646305     | -1.309115891     | -1.453141202     | -1.402132423     | -1.812028705 | 0.696285375        |            |
| NM_003596        | TPST1     | -0.774306308     | -0.674300928     | -0.123652374     | -0.092013878     | -0.164570028     | -0.046455513     | -0.312549838 | 0.322832918        | 1          |
| NM_000129        | F13A1     | -1.142032748     | -1.037272543     | -0.038688858     | -0.131280679     | -1.497818827     | -1.312429134     | -0.859950465 | 0.620928529        |            |
| NM_002731        | PRKACB    | -1.011072338     | -1.032191533     | -0.223821059     | -0.384355538     | -0.521610881     | -0.425795189     | -0.599807756 | 0.34066848         | 10         |
| NM_001482        | GATM      | -0.340103432     | -0.446443832     | -0.601126918     | -0.621274302     | -1.441684205     | -1.437187712     | -0.814636733 | 0.494870001        | 11         |
| NM_000677        | ADORA3    | -1.57763162      | -1.591203995     | -0.356265318     | -0.370834656     | -1.649875119     | -1.92649118      | -1.245386648 | 0.694675261        | 1          |
| NM_020362        | PITHD1    | -0.656463418     | -0.608586573     | -0.132963386     | -0.198773236     | -0.464364381     | -0.441486462     | -0.417106243 | 0.212221943        | 5          |
| NM_013308        | GPR171    | -1.062439912     | -0.971339566     | -2.701184225     | -2.470683152     | -0.683938626     | -0.820587156     | -1.45169544  | 0.891018294        | 12         |
| NM_002371        | MAL       | -0.843058848     | -0.704240041     | -3.041125348     | -2.943123983     | -0.8856428       | -1.049665515     | -1.577809422 | 1.101488978        |            |
| NM_001178126     | IGLL5     | -1.226899044     | -1.011679171     | -2.538817678     | -2.613049755     | -1.501288483     | -1.488248219     | -1.729997058 | 0.680266297        |            |
| NM_006159        | NELL2     | -0.675280278     | -0.507305661     | -2.334335332     | -2.488018985     | -0.726561502     | -0.647794551     | -1.229882718 | 0.919193428        |            |
| NM_002258        | KLRB1     | -0.554364779     | -0.740102335     | -2.00808683      | -2.136960424     | -1.071601332     | -1.250285814     | -1.293566919 | 0.652033148        |            |
| NM_014767        | SPOCK2    | -1.704071577     | -1.857451462     | -2.636960299     | -2.701015041     | -1.668554471     | -1.717989094     | -2.047673657 | 0.485959639        |            |
| NM_198196        | CD96      | -0.696125208     | -0.593621022     | -2.231885364     | -2.09452307      | -0.842749897     | -0.825060622     | -1.213994197 | 0.742101926        |            |
| ENST0000039237   | IGDK      | -1.610846846     | -1.291948829     | -2.789431718     | -2.773346202     | -2.07316802      | -2.035264304     | -2.095667653 | 0.60427258         |            |
| NM_001768        | CD8A      | -0.662776678     | -0.89732213      | -2.535116732     | -2.411008205     | -0.956368469     | -1.062611052     | -1.420867211 | 0.826418592        |            |
| NM_002341        | LTB       | -1.613354977     | -1.225439473     | -2.85302617      | -2.94015058      | -1.372357878     | -1.403359095     | -1.901281362 | 0.78133449         |            |
| NM_014207        | CD5       | -0.794298307     | -0.722912376     | -2.087569779     | -2.106745623     | -0.671205058     | -0.678643314     | -1.176895743 | 0.714200006        |            |
| NM_002104        | GZMK      | -0.444578248     | -0.150299334     | -2.282560308     | -2.427657263     | -0.529490154     | -0.621743696     | -1.076054834 | 1.004330829        |            |
| NM_014722        | FAM65B    | -0.620388577     | -0.219090372     | -2.008572585     | -1.802580879     | -0.268834554     | -0.481008858     | -0.900079304 | 0.794899899        |            |
| ENST00000390547  | IGHA1     | -0.374010217     | -0.390645917     | -2.162315619     | -2.118474601     | -1.39912612      | -1.428199573     | -1.312128674 | 0.790347938        |            |
| NM_148965        | TNFRSF25  | -1.440527616     | -1.451045121     | -3.083101823     | -3.019569571     | -1.30307197      | -1.350649733     | -1.941327639 | 0.861823909        |            |
| NM_006725        | CD6       | -1.19371842      | -0.949347873     | -2.047800435     | -2.040130221     | -0.679723787     | -0.536437995     | -1.241193122 | 0.661554374        |            |
| NM_001767        | CD2       | -2.793477034     | -2.657363371     | -4.380364013     | -4.51587283      | -2.078919972     | -2.167563424     | -3.098927516 | 1.081291773        |            |
| NM_017933        | PID1      | -1.334882199     | -1.123752236     | -0.812140465     | -0.249230214     | -2.330043267     | -2.701564186     | -1.320268711 | 1.04007832         |            |
| ENST00000390551  | IGHG3     | -0.295267099     | -0.367642431     | -0.710481179     | -0.691586762     | -0.341380192     | -0.382887578     | -0.464874207 | 0.185426285        |            |
| NM_152866        | MSA4A1    | -0.669085636     | -0.593621022     | -0.965302399     | -0.812678376     | -0.749724315     | -0.562576721     | -0.725498078 | 0.150207002        |            |
| NM_003121        | SPIB      | -0.43060032      | -0.330818667     | -1.079752434     | -0.556533815     | -0.849450814     | -0.777757329     | -0.670671896 | 0.281832671        |            |
| NM_006235        | POU2AF1   | -0.846333813     | -1.024642717     | -1.504356826     | -1.609182871     | -1.184297532     | -1.137936986     | -1.217791791 | 0.289168721        |            |
| NM_152296        | ATPIA3    | 1.065830065      | 1.153916169      | 1.079159224      | 0.93499379       | 0.380491665      | 0.226792188      | 0.80686385   | 0.399085765        |            |
| NM_004633        | IL1R2     | 1.6865755        | 1.887059922      | 0.378575927      | 0.203046934      | 0.955640799      | 0.860995048      | 0.995346022  | 0.678376502        |            |
| NM_001172        | ARG2      | 1.277183548      | 1.287324072      | 0.312664826      | 0.366667991      | 0.355630197      | 0.512124012      | 0.685265774  | 0.467295172        | 13         |
| NM_004615        | TSPAN7    | 0.677530199      | 0.833303         | 2.512598751      | 2.533954705      | 0.896725707      | 0.912759954      | 1.394478719  | 0.878332776        | 6          |
| NM_002309        | LIF       | 0.92385174       | 0.855900108      | 0.134783983      | 0.067470431      | 0.486896914      | 0.616873895      | 0.514296179  | 0.35798844         |            |
| NM_001025366     | VEGFA     | 1.052609135      | 1.081569247      | 0.614795091      | 0.587387906      | 1.000890123      | 0.861532163      | 0.866463944  | 0.219196574        | 14         |
| NM_000073        | CD3G      | 0.683562372      | 0.722470193      | 0.395664755      | 0.563994874      | 0.2211598        | 0.158881262      | 0.457122209  | 0.23803691         |            |
| NM_000732        | CD3D      | 1.939773492      | 2.114086944      | 1.432574455      | 1.507153427      | 1.167837383      | 1.250993409      | 1.569419852  | 0.378549184        |            |
| NM_000576        | IL1B      | 0.120703651      | 0.117081911      | 0.352773716      | 0.294523198      | 1.290071109      | 1.278331349      | 0.575580822  | 0.56798987         | 15         |
| NM_001008540     | CXCR4     | 1.375972405      | 1.343364601      | 0.88041326       | 0.855668985      | 0.871708008      | 0.900460289      | 1.037597925  | 0.250141408        | 16         |
| NM_015714        | GOS2      | 0.981400318      | 0.960626553      | 1.040424186      | 1.01521941       | 2.245997479      | 2.028016295      | 1.37861404   | 0.592114454        |            |
| NM_021181        | SLAMF7    | 0.697913337      | 0.910389113      | 0.064891268      | 0.08679108       | 0.329917011      | 0.244746172      | 0.389107997  | 0.342914175        | 17         |
| NM_003486        | SLC7A5    | 1.727712248      | 1.676075005      | 0.473277137      | 0.510149746      | 0.586725239      | 0.546154357      | 0.920015622  | 0.607028774        | 18         |
| NM_004417        | DUSP1     | 0.835203553      | 0.858259885      | 0.242787469      | 0.223760348      | 0.989660702      | 0.972497069      | 0.687028171  | 0.35674138         |            |
| NM_175839        | SMOX      | 0.46750539       | 0.455103638      | 0.303217854      | 0.349663856      | 0.779522713      | 0.734016178      | 0.514838272  | 0.197975365        |            |
| NM_002192        | INHBA     | 0.640279166      | 0.582721651      | 0.412412774      | 0.449761872      | 1.775233475      | 1.73246749       | 0.932146071  | 0.642092155        | 19         |
| NM_003811        | TNFSF9    | 1.264445984      | 1.08025231       | 0.512080969      | 0.481186666      | 1.092475687      | 1.002212273      | 0.905442315  | 0.328181072        |            |
| NM_001100812     | CXCL12    | 1.503012272      | 1.468096755      | 0.212266686      | 0.235775919      | 0.629875745      | 0.648671242      | 0.78294977   | 0.575231637        | 15         |
| NM_181054        | HIF1A     | 0.948406259      | 0.839172103      | 0.399685798      | 0.395663352      | 1.28177456       | 1.283694902      | 0.858066162  | 0.39828027         | 20         |
| NM_000963        | PTGS2     | 0.581174412      | 0.509767842      | 0.104279728      | 0.098204146      | 0.161319789      | 0.107354948      | 0.260350144  | 0.223159691        | 13         |
| NM_005375        | MYB       | 3.499775743      | 3.389197836      | 4.530634632      | 4.841587902      | 2.152346479      | 2.039161628      | 3.408784037  | 1.164013717        | 5          |
| NM_001661        | ARL4D     | 2.435439484      | 2.476020048      | 0.434521353      | 0.538697448      | 1.310952908      | 1.239860346      | 1.405915264  | 0.88739048         |            |
| NM_001002915     | IGFL2     | 2.709616395      | 2.671378259      | 0.217106968      | 0.284296147      | 1.155564423      | 1.290222678      | 1.388030812  | 1.099678956        |            |
| NM_182908        | DHRS2     | 3.416933701      | 3.30810239       | 3.799972307      | 3.714671415      | 1.347452045      | 1.439846691      | 2.837829758  | 1.133725689        |            |
| NM_002728        | PRG2      | 4.187722242      | 4.262844823      | 0.825942813      | 0.824745112      | 1.239202917      | 1.358372817      | 2.116471787  | 1.647745929        |            |
| NM_012250        | RRAS2     | 2.422034083      | 2.348244032      | 0.73511902       | 0.962415028      | 0.73511902       | 0.962415028      | 1.360891035  | 0.800204723        | 21         |
| NM_016269        | LEF1      | 2.515079235      | 2.518435867      |                  |                  |                  |                  |              |                    |            |

|                 |          |             |             |             |             |             |             |             |             |    |
|-----------------|----------|-------------|-------------|-------------|-------------|-------------|-------------|-------------|-------------|----|
| NM_020689       | SLC24A3  | 2.509869054 | 2.487945778 | 0.24417411  | 0.29596393  | 0.855669424 | 0.686652881 | 1.180045863 | 1.047391562 | 23 |
| NM_016459       | MZB1     | 2.583394848 | 2.596940739 | 0.723107334 | 0.847418516 | 0.723107334 | 0.847418516 | 1.386897881 | 0.933715209 | 24 |
| NM_014220       | TM4SF1   | 3.684623887 | 3.664781802 | 1.28603437  | 1.322213046 | 1.28603437  | 1.322213046 | 2.094316753 | 1.224284799 |    |
| NM_002648       | PIM1     | 2.426849072 | 2.423825868 | 0.429656285 | 0.366686471 | 1.503533027 | 1.466063122 | 1.436102308 | 0.907656914 |    |
| NM_001145033    | AG2      | 3.301542123 | 3.32959608  | 1.297876972 | 1.280865528 | 1.297876972 | 1.280865528 | 1.964770534 | 1.046389336 |    |
| NR_026597       | DIRC3    | 2.407209551 | 2.404685824 | 0.272469241 | 0.05800101  | 0.792124093 | 0.832259623 | 1.127791557 | 1.033770692 |    |
| NM_001172292    | NIPAL4   | 3.697098425 | 3.724208584 | 0.386233055 | 0.357622115 | 2.441272989 | 2.528298357 | 2.189122254 | 1.510887475 |    |
| ENST00000380464 | PLIN2    | 2.870003562 | 2.72541771  | 0.871565548 | 0.813998109 | 1.432938739 | 1.492002491 | 1.700987693 | 0.895128106 |    |
| NM_033120       | NKD2     | 2.411773556 | 2.215007278 | 2.978825795 | 2.738906968 | 1.21440627  | 1.288940654 | 2.141310087 | 0.737945891 |    |
| NM_002404       | MFAP4    | 2.736404754 | 2.75575098  | 1.847561408 | 1.806745917 | 0.977980575 | 1.007566721 | 1.855335059 | 0.784591106 |    |
| NM_021158       | TRIB3    | 3.216638594 | 3.232921566 | 0.211681968 | 0.189167337 | 0.153481855 | 0.188647295 | 1.198756436 | 1.569470086 | 25 |
| NM_139314       | ANGPTL4  | 3.330031124 | 3.44457626  | 1.140097981 | 0.91885867  | 1.183578945 | 1.19680129  | 1.868990712 | 1.180912556 |    |
| NM_000597       | IGFBP2   | 1.396431888 | 1.434434584 | 2.865212024 | 2.81262923  | 1.226250159 | 1.166577261 | 1.816922524 | 0.798159749 |    |
| NM_001853       | COL9A3   | 1.076008673 | 1.19733003  | 3.400763795 | 3.217354319 | 1.457647379 | 1.231997201 | 1.930183566 | 1.076741237 |    |
| NM_001005464    | HIST2H3A | 0.233668323 | 0.164024855 | 2.432292745 | 2.451638157 | 1.347452045 | 1.439846691 | 1.344820469 | 1.004551206 |    |
| NM_018667       | SMPD3    | 1.538149607 | 1.624892199 | 3.043850324 | 2.911168449 | 0.859509374 | 1.013238869 | 1.83180147  | 0.935792179 | 26 |
| NM_018492       | PBK      | 0.354317436 | 0.235393346 | 2.57989656  | 2.694358302 | 0.529973589 | 0.422286034 | 1.136037545 | 1.167226926 |    |
| NM_004867       | ITM2A    | 2.267706361 | 2.28824222  | 2.570112004 | 2.646682524 | 0.152224439 | 0.197676711 | 1.687107376 | 1.180949555 |    |
| NR_033916       | CCDC26   | 1.467317138 | 1.522604404 | 3.902704634 | 3.934413137 | 1.358916834 | 1.179927602 | 2.227647291 | 1.315025728 |    |
| NM_001004317    | LIN28B   | 1.271591361 | 1.399339878 | 3.158333171 | 3.24915891  | 1.364422982 | 1.546020693 | 1.998144499 | 0.938460457 | 27 |
| NM_002612       | PDK4     | 1.884871379 | 1.962521516 | 1.552354138 | 1.426121895 | 2.388744452 | 2.28023544  | 1.915808136 | 0.382493573 | 28 |

Fold changes (FC) are shown.

### References of Supplementary Data 1

1. Kang, K. *et al.* Interferon-gamma Represses M2 Gene Expression in Human Macrophages by Disassembling Enhancers Bound by the Transcription Factor MAF. *Immunity* **47**, 235-250 e234, doi:10.1016/j.immuni.2017.07.017 (2017).
2. Martinez, F. O., Gordon, S., Locati, M. & Mantovani, A. Transcriptional profiling of the human monocyte-to-macrophage differentiation and polarization: new molecules and patterns of gene expression. *J Immunol* **177**, 7303-7311, doi:10.4049/jimmunol.177.10.7303 (2006).
3. Honore, C. *et al.* The innate pattern recognition molecule Ficolin-1 is secreted by monocytes/macrophages and is circulating in human plasma. *Mol Immunol* **45**, 2782-2789, doi:10.1016/j.molimm.2008.02.005 (2008).
4. Carson, W. F. *et al.* Enhancement of macrophage inflammatory responses by CCL2 is correlated with increased miR-9 expression and downregulation of the ERK1/2 phosphatase Dusp6. *Cell Immunol* **314**, 63-72, doi:10.1016/j.cellimm.2017.02.005 (2017).
5. Cuevas, V. D. *et al.* MAFB Determines Human Macrophage Anti-Inflammatory Polarization: Relevance for the Pathogenic Mechanisms Operating in Multicentric Carpotarsal Osteolysis. *J Immunol* **198**, 2070-2081, doi:10.4049/jimmunol.1601667 (2017).
6. Gundra, U. M. *et al.* Alternatively activated macrophages derived from monocytes and tissue macrophages are phenotypically and functionally distinct. *Blood* **123**, e110-122, doi:10.1182/blood-2013-08-520619 (2014).
7. Liao, X. *et al.* Kruppel-like factor 4 regulates macrophage polarization. *J Clin Invest* **121**, 2736-2749, doi:10.1172/JCI45444 (2011).
8. Desterke, C., Turhan, A. G., Bennaceur-Griscelli, A. & Griscelli, F. PPARgamma Cistrome Repression during Activation of Lung Monocyte-Macrophages in Severe COVID-19. *iScience* **23**, 101611, doi:10.1016/j.isci.2020.101611 (2020).

9. Yasuda, K., Nakanishi, K. & Tsutsui, H. Interleukin-18 in Health and Disease. *Int J Mol Sci* **20**, doi:10.3390/ijms20030649 (2019).
10. Na, Y. R. *et al.* Protein Kinase A Catalytic Subunit Is a Molecular Switch that Promotes the Pro-tumoral Function of Macrophages. *Cell Rep* **31**, 107643, doi:10.1016/j.celrep.2020.107643 (2020).
11. Jha, A. K. *et al.* Network integration of parallel metabolic and transcriptional data reveals metabolic modules that regulate macrophage polarization. *Immunity* **42**, 419-430, doi:10.1016/j.immuni.2015.02.005 (2015).
12. Schridde, A. *et al.* Tissue-specific differentiation of colonic macrophages requires TGFbeta receptor-mediated signaling. *Mucosal Immunol* **10**, 1387-1399, doi:10.1038/mi.2016.142 (2017).
13. Ashley, J. W. *et al.* Polarization of Macrophages toward M2 Phenotype Is Favored by Reduction in iPLA2beta (Group VIA Phospholipase A2). *J Biol Chem* **291**, 23268-23281, doi:10.1074/jbc.M116.754945 (2016).
14. Granata, F. *et al.* Production of vascular endothelial growth factors from human lung macrophages induced by group IIA and group X secreted phospholipases A2. *J Immunol* **184**, 5232-5241, doi:10.4049/jimmunol.0902501 (2010).
15. Orecchioni, M., Ghosheh, Y., Pramod, A. B. & Ley, K. Macrophage Polarization: Different Gene Signatures in M1(LPS+) vs. Classically and M2(LPS-) vs. Alternatively Activated Macrophages. *Front Immunol* **10**, 1084, doi:10.3389/fimmu.2019.01084 (2019).
16. Tian, X. *et al.* CXCR4 knockdown prevents inflammatory cytokine expression in macrophages by suppressing activation of MAPK and NF-kappaB signaling pathways. *Cell Biosci* **9**, 55, doi:10.1186/s13578-019-0315-x (2019).
17. Simmons, D. P. *et al.* SLAMF7 engagement superactivates macrophages in acute and chronic inflammation. *Sci Immunol* **7**, eabf2846, doi:10.1126/sciimmunol.abf2846 (2022).
18. Yoon, B. R., Oh, Y. J., Kang, S. W., Lee, E. B. & Lee, W. W. Role of SLC7A5 in Metabolic Reprogramming of Human Monocyte/Macrophage Immune Responses. *Front Immunol* **9**, 53, doi:10.3389/fimmu.2018.00053 (2018).
19. Sierra-Filardi, E. *et al.* Activin A skews macrophage polarization by promoting a proinflammatory phenotype and inhibiting the acquisition of anti-inflammatory macrophage markers. *Blood* **117**, 5092-5101, doi:10.1182/blood-2010-09-306993 (2011).
20. Wang, T. *et al.* HIF1alpha-Induced Glycolysis Metabolism Is Essential to the Activation of Inflammatory Macrophages. *Mediators Inflamm* **2017**, 9029327, doi:10.1155/2017/9029327 (2017).
21. Borrell-Pages, M., Romero, J. C., Juan-Babot, O. & Badimon, L. Wnt pathway activation, cell migration, and lipid uptake is regulated by low-density lipoprotein receptor-related protein 5 in human macrophages. *Eur Heart J* **32**, 2841-2850, doi:10.1093/eurheartj/ehr062 (2011).

22. Xue, J. *et al.* Transcriptome-based network analysis reveals a spectrum model of human macrophage activation. *Immunity* **40**, 274-288, doi:10.1016/j.immuni.2014.01.006 (2014).
23. Villa-Bellosta, R., Hamczyk, M. R. & Andres, V. Novel phosphate-activated macrophages prevent ectopic calcification by increasing extracellular ATP and pyrophosphate. *PLoS One* **12**, e0174998, doi:10.1371/journal.pone.0174998 (2017).
24. Zhang, H., Chen, X. & Sairam, M. R. Novel hormone-regulated genes in visceral adipose tissue: cloning and identification of proinflammatory cytokine-like mouse and human MEDA-7: implications for obesity, insulin resistance and the metabolic syndrome. *Diabetologia* **54**, 2368-2380, doi:10.1007/s00125-011-2212-7 (2011).
25. Riera-Borrull, M. *et al.* Palmitate Conditions Macrophages for Enhanced Responses toward Inflammatory Stimuli via JNK Activation. *J Immunol* **199**, 3858-3869, doi:10.4049/jimmunol.1700845 (2017).
26. Al-Rashed, F. *et al.* Neutral sphingomyelinase 2 regulates inflammatory responses in monocytes/macrophages induced by TNF-alpha. *Sci Rep* **10**, 16802, doi:10.1038/s41598-020-73912-5 (2020).
27. Jaiswal, A., Maurya, M., Maurya, P. & Barthwal, M. K. Lin28B Regulates Angiotensin II-Mediated Let-7c/miR-99a MicroRNA Formation Consequently Affecting Macrophage Polarization and Allergic Inflammation. *Inflammation* **43**, 1846-1861, doi:10.1007/s10753-020-01258-1 (2020).
28. Min, B. K. *et al.* Pyruvate Dehydrogenase Kinase Is a Metabolic Checkpoint for Polarization of Macrophages to the M1 Phenotype. *Front Immunol* **10**, 944, doi:10.3389/fimmu.2019.00944 (2019).
